1 **Exaggerated postnatal surge of orexin and the effects of elimination of excess orexin**  
2 **on blood pressure in spontaneously hypertensive rats in postnatal development**

3

4 **Authorship:** Savannah Barnett, Ruhong Dong, Logan Briggs, Alexander Moushey, Aihua  
5 Li

6

7 **Address:** Department of Molecular and Systems Biology, Geisel School of Medicine at  
8 Dartmouth, 66 College Street, Hanover, NH 03755

9

10 **Running title:** Postnatal orexin neurons in hypertension

11 **Key words:** hypertension; orexin; postnatal neurogenesis

12 **Total words:** 8,114

13 **Total number of references:** 72

14

15 **Corresponding author**

16 Savannah Barnett

17 Department of Molecular and Systems Biology,

18 Geisel School of Medicine at Dartmouth,

19 66 College Street, Hanover, NH 03755

20 Tel: 757 748 2225

21 [Sjbarnett757@gmail.com](mailto:Sjbarnett757@gmail.com)

22 **New Findings**

23 *What is the central question of this study?*

24 Excess orexin neurons have been associated with hypertension in spontaneously  
25 hypertensive rats, however, the association and mechanism between developing excess  
26 orexin neurons and high blood pressure are unknown.

27

28 *What is the main finding and its importance?*

29 Using spontaneously hypertensive rats in anatomical and physiological studies, we  
30 provided evidence showing that the excess OX neurons, primarily via exaggerated OX  
31 neurogenesis, may be necessary in developing a higher ABP in SHR during development,  
32 and modulation of the overactive orexin system may be beneficial in treating hypertension.

33 **Abstract**

34 It has been established that an overactive orexin (OX) system is associated with neurogenic  
35 hypertension in spontaneously hypertensive rats (SHRs). However, the chronology and  
36 mechanism of such association between orexin system and hypertension is unclear. We  
37 hypothesized that an aberrant surge of OX neurons in SHRs precedes the aberrant increase  
38 of arterial blood pressure (ABP) during postnatal development, which was primarily  
39 contributed by the exaggerated postnatal OX neurogenesis. We found that (1) SHRs  
40 experienced a greater surge in the number of orexin neurons than normotensive Wistar-  
41 Kyoto (WKY) rats before P16, which led to significantly more OX neurons than age-  
42 matched controls by P15-16 ( $3680 \pm 219$  vs  $2407 \pm 182$ , respectively,  $P=0.002$ ). (2)  
43 Exaggerated OX neurogenesis, marked by bromodeoxyuridine (BrdU), was the primary  
44 contributor to excessive OX neurons in SHRs during development. (3) In contrast, SHRs  
45 and normotensive control rats have similar mean arterial blood pressure (ABP) at P15, and  
46 a significantly higher ABP in SHR than WKY emerges at P20 ( $74.8 \pm 2.5$  vs  $66.9 \pm 4.4$   
47 mmHg in wakefulness, respectively,  $P<0.05$ ), a few days following the surge of OX  
48 activity. (4) Selectively eliminating excess (~30%) orexin neurons, via a targeted  
49 neurotoxin, in SHRs between P30 and P40 results in a significantly lowered ABP  
50 compared to non-lesioned SHRs at P40. We suggest that the postnatal surge of OX  
51 neurons, primarily attributed to the exaggerated postnatal OX neurogenesis, may be  
52 necessary for the development of higher ABP in SHRs, and modulation of the overactive  
53 OX system may have a preventative effect during the pre-hypertensive period.

## 54 **Introduction**

55 Participation of hypothalamic orexin neurons in cardiorespiratory regulation has been well  
56 established over the last two decades (Samson *et al.*, 1999; Shirasaka *et al.*, 1999; Shahid  
57 *et al.*, 2011; Li & Nattie, 2014). Orexin neurons project to and excite many  
58 cardiorespiratory control nuclei in the central nervous system, including the paraventricular  
59 nucleus (PVN), nucleus tractus solitarius (NTS), retrotrapezoidal nucleus (RTN),  
60 medullary raphe, rostro-ventrolateral medulla (RVLM), and sympathetic preganglionic  
61 neurons of the intermediolateral column (Peyron *et al.*, 1998; Trivedi *et al.*, 1998; Van Den  
62 Pol, 1999; Antunes *et al.*, 2001; Marcus *et al.*, 2001; Shirasaka *et al.*, 2001; Yang &  
63 Ferguson, 2003; van den Top *et al.*, 2003; Huang *et al.*, 2010; Shahid *et al.*, 2012). Central  
64 administration of orexin (OX) leads to significant and sustained increases in arterial blood  
65 pressure (ABP), heart rate, catecholamine release, and renal sympathetic nerve activity  
66 (RSNA) in conscious and anesthetized rats, an effect that is prevented by pre-treatment  
67 with OXR antagonists (Samson *et al.*, 1999; Shirasaka *et al.*, 1999; Huang 2010; Shahid *et*  
68 *al.*, 2011; Li & Nattie, 2014).

69 A link between an overactive orexin system and the pathophysiology of neurogenic  
70 hypertension has been recently established in spontaneously hypertensive rats (SHRs) and  
71 mice (Lee *et al.*, 2013, 2015; Li *et al.*, 2013; Clifford *et al.*, 2015; Jackson *et al.*, 2016). On  
72 average, adult spontaneously hypertensive mice and rats have about 30% more orexin-  
73 producing neurons than their normotensive background controls (Lee *et al.*, 2015; Li *et al.*,  
74 2016; Jackson *et al.*, 2016). Modulating the overactive orexin system via blocking both  
75 orexin receptors with a dual orexin receptor antagonist can 1) significantly lower ABP (by  
76 20-30 mmHg), sympathetic nerve activity (SNA), and catecholamine release in conscious  
77 adult SHRs (Li *et al.*, 2013) and normalize ABP in younger SHRs (postnatal day (P)30-  
78 58), and 2) normalize the exaggerated ventilatory hypercapnic chemoreflex at both ages  
79 (Li *et al.*, 2016). These findings suggest that excessive orexin-producing neurons may play  
80 important roles in the pathophysiology of neurogenic hypertension in SHRs including the  
81 regulation of both the ABP and hypercapnic ventilatory chemoreflex. At present, the  
82 chronology of the association between an overactive orexin system and development of

83 hypertension, the sources of excess orexin neurons, and the mechanism of this relationship  
84 remain unclear.

85 The orexin system encounters pre- and post-natal developmental changes and matures  
86 postnatally in mammals (Yamamoto *et al.*, 2000; Steininger *et al.*, 2004; Amiot *et al.*,  
87 2005; Sawai *et al.*, 2010; Stoyanova *et al.*, 2010; Iwasa *et al.*, 2015). Using *in situ*  
88 hybridization, Yamamoto *et al.* showed that *prepro-orexin* mRNA in the rat hypothalamus  
89 gradually increased during early postnatal development and peaked by 3 weeks of age  
90 (Yamamoto *et al.*, 2000). Further, Sawai *et al.* showed a clear increase in the number of  
91 OXA- and OXB-peptide-expressing neurons from 2 weeks to 9 weeks of age (Sawai *et al.*,  
92 2010). It is not clear whether the postnatal increase in orexin was due to postnatal cell  
93 maturation or new cell proliferation, e.g. neurogenesis. Additionally, these studies were  
94 completed in normotensive animals and did not include comprehensive cell counts at  
95 various ages. At present, little is known about whether the increased number of OX  
96 neurons in SHR is developed prenatally or postnatally, how orexin neuron development  
97 and blood pressure development are chronologically correlated postnatally, and whether or  
98 not modulation of the OX system can change the course of developing higher ABP during  
99 development.

100 In this study, using SHR and their normotensive background control Wistar–Kyoto  
101 (WKY) rat pups, we aimed to address the following questions: 1) At which developmental  
102 age the ABP and number of orexin neurons in SHR deviate from age-matched  
103 normotensive WKY rat pups; 2) What is the primary contributing factor to the excess  
104 proliferation of orexin-producing neurons during postnatal development in SHR e.g.  
105 neurogenesis or cell maturation; 3) What is the chronological relationship between excess  
106 orexin neurons and the development of hypertension in SHR and WKY; and 4) Does  
107 elimination of excess orexin neurons have an impact on the development of a higher ABP  
108 and exaggerated hypercapnic chemoreflex during development. We hypothesized that  
109 exaggerated postnatal orexin neuron neurogenesis leads to a postnatal surge of orexin  
110 neurons in SHR, which facilitate an aberrant increase in ABP in SHR, and that  
111 elimination of these excess orexin neurons can prevent SHR from developing a higher  
112 ABP and hypercapnic chemoreflex during a developing age.

## 113 **Materials and Methods**

### 114 **Ethical approval**

115 All animal experimental and surgical protocols were within the guidelines of the National  
116 Institutes of Health for animal use and care and were approved by the Institutional Animal  
117 Care and Use Committee at the Geisel School of Medicine at Dartmouth. All animals were  
118 reared and transported in accordance with regulations of these governing bodies.

119

### 120 **General methods**

121 SHR and normotensive WKY rats were used for the experiments in this study. All rats  
122 were housed in a temperature- and light-controlled environment set on a 12h-12h light-  
123 dark cycle (lights on at 00.00 h; lights off at 12.00 h). Food and water were provided *ad*  
124 *libitum*. The general methods are those in common use in our laboratory (Li *et al.*, 2008,  
125 2013, 2016). A total of 75 SHR and 44 WKY rats between the ages of P7 and P40 were  
126 used in four sets of anatomical and physiological experiments, and males and females were  
127 assigned into each group randomly. At the conclusion of the experiments, the rats were  
128 euthanized with an overdose of sodium pentobarbital ( $>75$  mg kg<sup>-1</sup>, i.p.; Euthasol; Virbac  
129 Inc., Fort Worth, TX, USA).

130

### 131 **Surgeries and procedures**

132 *Blood pressure probe and EEG/EMG.* All animals used to study ABP were surgically  
133 implanted with a telemetric blood pressure probe. Rats were anesthetized with isoflurane  
134 (Piramal Enterprises Ltd.) or a ketamine (Putney, Inc., Portland, ME, USA) and xylazine  
135 (Lloyd Labs, Walnut, CA, USA) cocktail (90/15 mg kg<sup>-1</sup>, I.M.). Ketoprofen (3 mg/kg,  
136 subcutaneously) was used as an analgesic after surgery. All rats were implanted with an  
137 HD-X11 or PA-C10 telemetric probe (DSI, St. Paul, MN, USA), which allows for  
138 uninterrupted and reliable recording of ABP during the experiment as similarly described  
139 in our previous publications (Li *et al.*, 2008, 2013, 2016). In brief, the catheter of the probe  
140 was inserted into the descending aorta of the rat via the femoral artery for ABP. For EEG  
141 activity, two wire leads of HD-X11 transmitter were tunneled subcutaneously on to the  
142 surface of the parietal bone in the skull for animals at P7-30. For animals at P35-40, three

143 EEG electrodes were screwed onto the skull and two EMG electrodes were sutured onto  
144 the dorsal neck muscles. All electrode leads were inserted into a sterilized six-prong plastic  
145 pedestal that was secured to the skull.

146 *BrdU (Bromodeoxyuridine) injection.* Newly proliferated OX neurons in the hypothalamus  
147 were marked using BrdU and identified by BrdU and OX-ir double staining. Rat pups were  
148 injected with BrdU (i.p. 50 mg kg<sup>-1</sup> day<sup>-1</sup> BrdU in saline; Roche Diagnostics, Indianapolis,  
149 IN, USA) for 5 consecutive days, i.e. from P5 to P9, P10 to 14, or P15 to P19, respectively  
150 (hereafter, the simplified P5-9, P10-14 and P15-19 injected rats terminology will be used).

151 *Hcrt-SAP injection.* Elimination of excess OX neurons was achieved using a specific toxin  
152 for OX neurons, Hcrt-SAP (hypocretin-2-saporin, Advanced Targeting Systems, San  
153 Diego, CA, USA). The method of stereotaxic injection was similar to those described in  
154 our previous study and will be brief here (Nattie *et al.*, 2004; Li & Nattie, 2006). Rats were  
155 anesthetized with a ketamine (Putney, Inc., Portland, ME, USA) and xylazine (Lloyd Labs,  
156 Walnut, CA, USA) cocktail (90/15 mg kg<sup>-1</sup>, I.M.), and then fixed in a Kopf stereotaxic  
157 frame. Hcrt-SAP or its control IgG-SAP was unilateral injected (0.5 uL, 90 ng/ uL) into the  
158 hypothalamus with the coordinates at 1.4 mm lateral, 2.3 mm caudal from Bregma and 8.8  
159 mm below the surface of the skull. All injections were made using a 1 uL Hamilton  
160 syringe, and each microinjection lasted at least 5 min and the needle remained in position  
161 for another 5 min before removal.

162

### 163 **Blood pressure and ventilatory measurements and data collection**

164 The methods used to measure ABP, body temperature, and EEG were those in common  
165 use in our laboratory (Cummings *et al.*, 2011; Penatti *et al.*, 2011; Li *et al.*, 2013, 2016).

166 *For study in P15-P30 rats,* pups were placed in a water-jacketed glass chamber with body  
167 temperature held at 36 ± 0.5°C throughout the experiment by controlling the temperature  
168 of the water perfused through the chamber. The signals of ABP, core body temperature,  
169 EEG, and barometric pressure of HD-X11 telemetric probe were collected. *For study in*  
170 *P37-40 rats,* animals were placed in a traditional whole-body plethysmograph with food ad  
171 libidum as described previously (Li *et al.*, 2013a, 2016). Body temperature was measured  
172 before and after recording. Raw EEG and EMG outputs from the skull and neck skeletal

173 muscle electrodes were filtered at 0.3–70 and 0.1–100 Hz, respectively, using a Grass  
174 Physiodata Amplifier System (NatusNeurology Inc., Grass Products, Middleton, WI,  
175 USA). All data were collected continuously throughout the experiment via a PhysioTel  
176 Connect device enabler system (DSI, St. Paul, MN, USA) using LabChart 8 software  
177 (ADInstruments, Colorado Springs, CO, USA). ABP signal was sampled at 1,000 Hz  
178 whereas breathing, EEG, and body temperature were sampled at 150 Hz. Heart rate (HR)  
179 was derived from pulse pressure of ABP.

180

## 181 **Histology**

182 *Tissue processing and harvesting.* Rats were deeply anaesthetized with ketamine and  
183 xylazine and then transcardially perfused with saline followed by chilled 4%  
184 paraformaldehyde (PFA, 4% in 0.1 m phosphate buffer, pH 7.4). The brain was harvested  
185 and post-fixed overnight in 4% PFA at 4°C, then cryoprotected in 30% sucrose for 48 h. 40  
186  $\mu\text{m}$  thick brain sections were used for immunohistochemical staining.

187 *Immunohistochemical staining.* The general methods used for all immunohistochemical  
188 staining procedures were similar to those described in our previous studies (Li *et al.*,  
189 2016), and will be brief here. Free-floating sections were first incubated in a primary  
190 antibody at 4°C for 48 h followed by a secondary antibody at 4°C for 24 h or at room  
191 temperature (RT) for 2 h. Phosphate buffered saline (PBS) or 0.1% Triton X-100 PBS  
192 (PBST) were used for all washes between antibody incubations. Peroxidase and  
193 diaminobenzidine (DAB) with or without nickel were used for visualization.

194 *For OX-only staining,* brain sections were incubated in anti-orexin-A primary antibody  
195 (1:10,000 dilution; goat polyclonal, SC-8070, Santa Cruz, Dallas, TX, USA), followed by  
196 biotinylated horse anti-goat IgG secondary antibody (1:1,00 dilution; Vector laboratories,  
197 Burlingame, CA, USA). DAB with nickel was used for visualization (black neurons).

198 *For BrdU and OX double staining,* a special treatment was used to enhance a better  
199 staining of BrdU. The brain sections were first denatured with 2N HCl for 45 minutes,  
200 followed by neutralization in 0.1M boric buffer for 30 minutes (min), and then washed  
201 three times with 0.1% Triton X-100 PBS (PBST). The sections were incubated in mouse  
202 anti-BrdU primary antibody (1:100 dilution; G3G4, Developmental Studies Hybridoma



203 Bank, Iowa City, Iowa, USA) followed by a biotinylated horse anti-mouse IgG secondary  
204 antibody (1:1,000 dilution; Vector Laboratories, Burlingame, CA, USA). Peroxidase and  
205 diaminobenzidine with nickel were used to visualize the BrdU (black nuclei). Brain  
206 sections were then incubated in a goat polyclonal anti-OXA primary antibody (1:10,000  
207 dilution; SC-8070, Santa Cruz, Dallas, TX, USA) followed by biotinylated horse anti-goat  
208 IgG secondary antibody (1:1,000 dilution; Vector Laboratories, Burlingame, CA, USA).  
209 Peroxidase and diaminobenzidine without nickel were used to visualize OX (brown  
210 neurons). Three types of neurons were identified for the quantification in this study (Figure  
211 2B and C). BrdU/OX-ir neurons, positive for both BrdU and OX, were identified as brown  
212 neurons with black nuclei, which were likely postnatally proliferated OX neurons. OX-ir  
213 only neurons, positive for OX-ir but negative for BrdU, were identified as brown without  
214 black nuclei, which were generated prior to the postnatal period in this study. BrdU-ir only  
215 neurons, positive for BrdU but negative for OX-ir, identified as black nuclei only, which  
216 were likely postnatally generated non-OX neurons in the hypothalamus.  
217 For cell counts, the hypothalamus was divided into three zones, the dorsomedial  
218 hypothalamus (DMH), the perifornical hypothalamus (PeF) and the lateral hypothalamus  
219 (LHA) in each hemisphere as described in the lab's previous study (Li *et al.*, 2016), and all  
220 cell counts were completed using NeuroLucida and Stereo Investigator (MFB Bioscience,  
221 Williston, VT, USA).

222

## 223 **Experimental designs and data analysis**

### 224 **Experiment 1: Postnatal developmental changes in number of orexin neurons in SHR**

225 To determine at which developmental age the number of OX-ir neurons in SHRs diverges  
226 from normotensive WKY rats. SHR and WKY rat pups were divided into three age groups,  
227 P7-8 (SHR n=5; WKY n=4), P15-16 (SHR n=12; WKY n=4), and P25-40 (SHR n=10;  
228 WKY n=8). Brains were harvested for quantification of OX-ir neuron at three postnatal  
229 developmental ages.

230 *Data analysis:* The total number of OX-ir neurons were quantified and compared between  
231 SHRs and WKY rats at three ages (P7-8, P15-17, and P25-40) using a two-way ANOVA  
232 with age and strain (SHR and WKY rats) as the factors. A Holm-Sidak or Student-

233 Newman-Keuls *post hoc* test was applied when appropriate. All values are reported as  
234 mean  $\pm$  SEM.

235 **Experiment 2: Postnatal neurogenesis of orexin neurons**

236 To determine whether SHR pups have more postnatal proliferation of orexin neurons than  
237 age matched normotensive WKY pups during development. The BrdU injected rats were  
238 divided into three age groups P5-9 (SHR n=5; WKY n=3), P10-14 (SHR n=3; WKY rats  
239 n=4), and P15-19 (SHR n=4; WKY rats n=3) with similar numbers of males and females in  
240 each group. The brains were harvested 1 day after the 5<sup>th</sup> injection of BrdU except for P5-9  
241 injected rats, which were harvested 3-5 days after the conclusion of BrdU injections.

242 *Data analysis:* The total number of OX neurons that are positive for BrdU (BrdU/OX-ir) in  
243 the hypothalamus were quantified and compared between SHRs and WKY rats at three age  
244 groups using a two-way ANOVA with age and strain (SHR and WKY rats) as the factors.  
245 Additionally, the differences in the number of BrdU/OX-ir in three hypothalamic zones,  
246 DMH, PeF and LHA, were compared between SHRs and WKY rats at P5-9, P10-14 and  
247 P15-19 using a two-way ANOVA with age and strain (SHR and WKY) as the factors. A  
248 *post hoc* Holm-Sidak multiple comparison was applied when appropriate. All values are  
249 reported as mean  $\pm$  SEM.

250 **Experiment 3: Chronological relationship between development of excess OX neurons  
251 and higher ABP in SHRs**

252 To determine at which developmental age SHRs begin to have a significantly higher ABP  
253 than age matched normotensive WKY controls and its chronological relationship with the  
254 postnatal changes in the OX system. Rat pups at four ages were used to measure the  
255 developmental change of ABP, P15 (SHR n=5; WKY n=4), P20 (SHR n=9; WKY n=6),  
256 P25 (SHR n=8; WKY n=8), and P30 (SHR n=11; WKY n=8) (table 1). One day after  
257 implantation of BP telemetry and EEG, rat pups were acclimatized in a water-jacketed  
258 chamber for at least 1 hour and body temperature was maintained at  $36 \pm 0.5^\circ\text{C}$ . ABP,  
259 EEG, and body temperature in wakefulness and sleep were collected continuously for 1.5-3  
260 hours in room air conditions.

261 *Data Analysis:* The mean ABP of SHR and WKY rat pups in wakefulness and NREM  
262 sleep at P15, P20, P25, and P30 were analyzed and compared using a two-way ANOVA

263 with age and strain (SHR and WKY rats) as the factors. A Holm-Sidak or Student-  
264 Newman-Keuls *post hoc* test was applied when appropriate. All values are reported as  
265 mean  $\pm$  SEM. Chronological relationship between development of excess OX neurons and  
266 higher ABP in SHRs and WKY rats is shown in Figure 3B.

267 **Experiment 4:** *The effects of eliminating excess orexin neurons on ABP and ventilatory*  
268 *chemoreflex*

269 To determine whether eliminating excess orexin neurons via Hcrt-SAP can prevent SHRs  
270 from developing a higher ABP and exaggerated hypercapnic response two groups of young  
271 SHRs (P30-40) were used. Ages of both groups at the day of injection and at the day of  
272 physiological experiments are included in Table 2. SHRs were randomly assigned into two  
273 groups to receive either Hcrt-SAP or IgG-SAP injection between P25-28 (n=6, WT 90.4g;  
274 n=5, WT 82.2g, respectively). Twelve days post-injection at P37-40, SHRs were allowed  
275 to acclimatize for 1-2 hours in an experimental whole-body plethysmography. ABP and  
276 ventilatory data in wakefulness and sleep were collected for 1-2 hours during the light  
277 period in room air, 1-2 hours during the dark period in room air, and 1-2 hours during the  
278 dark period in a 5% CO<sub>2</sub> mixed gas (5% CO<sub>2</sub> 21% O<sub>2</sub> balanced with nitrogen). At  
279 conclusion of the recording, the brain was harvested for OX-ir staining and quantification.  
280 *Data Analysis:* The number of OX neurons, mean ABP and ventilation were compared  
281 between Hcrt-SAP and IgG-SAP treated SHRs 12 days post injection. Two levels of  
282 analysis were utilized to evaluate the extent of elimination of orexin neuron induced by  
283 Hcrt-SAP. First, to determine the difference in the total number of OX-ir neurons between  
284 injected hemisphere and non-injected hemisphere in the hypothalamus and the three  
285 individual zones in same SHRs treated with either IgG-SAP or Hcrt-SAP (Fig 4-C) a One-  
286 Way ANOVA was used to compare the difference between two hemispheres. Second, to  
287 determine the total loss of OX neurons induced by Hcrt-SAP the difference in the  
288 percentage loss of OX neurons in the injected hemisphere between Hcrt-SAP and IgG-SAP  
289 treated rats a two-way ANOVA was used with treatments and regions as factors (Fig 4-B).  
290 Holm-Sidak *post hoc* for multiple comparisons was used when appropriate.  
291 For the physiological effects, mean ABP and ventilation were compared between Hcrt-  
292 SAP and IgG-SAP treated animals within the respected measuring light period using a

293 two-way ANOVA analysis with treatment and vigilance state as factors (Fig 5). Holm-  
294 Sidak *post hoc* for multiple comparisons when appropriate All values are reported as mean  
295  $\pm$  SEM.

296

## 297 **Results**

### 298 *Experiment 1: Postnatal developmental changes in number of orexin neurons in SHR*

299 The number of OX-ir neurons in the three hypothalamic zone (DMH, PeF, and LHA) and  
300 the hypothalamus (Hyp; three zones combined) at three developmental ages (P7-8, P15-16  
301 and P25-40) are summarized and shown in Figure 1. Both SHRs and WKY rats  
302 experienced developmental increases in the number of OX-ir neurons in the hypothalamus,  
303 however SHRs started to have significantly more OX neurons from P15 onward (Figure 1).

304 In SHR pups, there was a significant postnatal surge in the total number of OX-ir  
305 neurons in the Hyp during postnatal development. SHR pups at ages P15-16 ( $3680 \pm 219$ )  
306 and P25-40 ( $3690 \pm 166$ ) had significantly more OX-ir neurons in Hyp than the pups at P7-  
307 8 ( $2359 \pm 216$ ) ( $P < 0.001$ ; Two-way ANOVA with Holm-Sidak analysis; Figure 1). The  
308 increase in total number of OX neurons in the Hyp was primarily contributed by the PeF  
309 zone, where significantly more OX-ir neurons were found in pups at P15-16 and P25-40  
310 than at P7-8 ( $P < 0.001$ ; Two-way ANOVA with Holm-Sidak analysis; Figure 1 B-C).  
311 Additionally, a similar difference, but on a much smaller scale, was also found in both the  
312 DMH and LHA zones where SHR pups at P15-16 ( $P < 0.001$  &  $P = 0.017$ , respectively) and  
313 P25-40 ( $P < 0.001$  &  $P = 0.02$ , respectively) had more OX-ir neurons than the pups at P7-8  
314 (Two-way ANOVA with Holm-Sidak analysis; Figure 1 A).

315 In WKY rats, there was a noticeable small increase in total number of OX-ir neurons in  
316 the hypothalamus with age, however the change was not statistically significant among the  
317 three age groups (P7-8, P15-16 and P25-40) ( $P > 0.05$ ; Two-way ANOVA with Holm-Sidak  
318 analysis, Figure 1). Further analysis showed that there was a small but significant increase  
319 in the number of OX-ir neurons in the PeF zone with age, where WKY rat pups at ages  
320 P25-40 ( $1687 \pm 102$ ) had significantly more OX-ir neurons than the pups at P7-8  
321 ( $1337 \pm 27$ ) and P15-16 ( $1470 \pm 64$ ) ( $P = 0.005$  &  $P < 0.001$ , respectively, Figure 1C). There

322 was no significant difference in the number of OX-ir neurons in the LHA and DMH zones  
323 at any age in WKY rat pups ( $P>0.05$ ; Two-way ANOVA with Holm-Sidak analysis; Figure  
324 1 A-B).

325 Between SHR and WKY pups, there was an age-related difference in the number of  
326 OX-ir neurons in the hypothalamus, particularly in the PeF zone, during postnatal  
327 development between P15-P40 ( $P<0.001$ ; Two-way ANOVA with Holm-Sidak analysis;  
328 Figure 1 A-C). At P7-8, there was no statistical difference in the number of OX-ir neurons  
329 in the Hyp ( $2359 \pm 216$  vs  $2156 \pm 123$ , respectively) or any of the three hypothalamic  
330 zones (DMH, PeF, and LHA) between SHR and WKY rat pups ( $P>0.05$ ; Two-way  
331 ANOVA with Holm-Sidak analysis; Figure 1 A-C). At P15-16, a significant difference in  
332 total number of OX-ir neurons in the Hyp between SHRs ( $3680 \pm 219$ ) and WKY rats  
333 ( $2407 \pm 182$ ) emerged, and the difference was primarily contributed by the PeF zone ( $2423$   
334  $\pm 144$  vs  $1470 \pm 64$ , respectively), ( $P<0.001$ ; Two-way ANOVA with Holm-Sidak  
335 analysis, Figure 1). Additionally, there was a small but significant difference in the number  
336 of OX-ir neurons in the DMH zone between SHR ( $742\pm 85$ ) and WKY ( $445\pm 77$ ) rat pups at  
337 P15-16 ( $P=0.023$ ; Two-way ANOVA with Holm-Sidak analysis; Figure 1 A). Such  
338 differences between SHR and WKY rat pups persisted into ages P25-40 in the Hyp ( $3690$   
339  $\pm 166$  vs  $2852 \pm 185$ , respectively) and in the PeF zone ( $2242 \pm 96$  vs.  $1687 \pm 102$ ,  
340 respectively), ( $P<0.001$ ; Two-way ANOVA with Holm-Sidak analysis; Figure 1 A-B).  
341 There were no age-related significant differences in the number of OX-ir neurons in the  
342 LHA zone between SHR and WKY rat pups during the postnatal developmental periods  
343 studied ( $P>0.05$ ; Two-way ANOVA with Holm-Sidak analysis; Figure 1 A).

344

### 345 *Experiment 2: Postnatal neurogenesis of orexin neurons*

346 The representative images of newly proliferated OX-ir neurons marked by BrdU and the  
347 number of BrdU/OX-ir neurons in the three hypothalamic zones (DMH, PeF, and LHA)  
348 and the hypothalamus (Hyp; three zones combined) at the three developmental ages  
349 studied (P5-9, P10-14 and P15-19) in SHR and WKY pups are shown in Figure 2.

350 In SHR, there were age-related differences in the number of newly proliferated  
351 BrdU/OX-ir neurons in the hypothalamus, P5-9 ( $878 \pm 112$ ) and P10-14 ( $956 \pm 208$ ) BrdU  
352 injected pups had significantly more BrdU/OX-ir neurons in the hypothalamus than P15-19  
353 injected pups ( $372 \pm 56$ ) ( $P=0.004$  and  $0.002$ , respectively; Two-way ANOVA (age and  
354 region) with Holm-Sidak analysis; Figure 2 E). The majority of BrdU/OX-ir neurons were  
355 found in the PeF zone, where significantly more BrdU/OX-ir neurons were observed in P5-  
356 9 ( $644 \pm 181$ ) and P10-14 ( $701 \pm 169$ ) injected pups than in P15-19 injected pups ( $274 \pm 42$ ),  
357 ( $P=0.002$  &  $0.007$ , respectively; Two-way ANOVA (age and region) with Holm-Sidak  
358 analysis; Figure 2 E). It is also notable that there was a small but significant difference in  
359 the number of BrdU/OX-ir neurons in the DMH zone between P10-14 ( $159 \pm 10$ ) and P15-  
360 19 ( $54 \pm 11$ ) injected SHR pups ( $P=0.005$ ; Two-way ANOVA with Holm-Sidak analysis;  
361 Figure 2 E).

362 In WKY rats, P10-14 BrdU injected pups appeared to have more BrdU/OX-ir neurons  
363 in the PeF zone and Hyp ( $345 \pm 66$  &  $538 \pm 106$ , respectively) than P5-9 ( $248 \pm 50$  &  $355 \pm 50$ ,  
364 respectively) and P15-19 ( $203 \pm 42$  &  $314 \pm 43$ , respectively) injected pups, but differences  
365 were not statistically significant ( $P > 0.05$ ; Two-way ANOVA with Holm-Sidak analysis;  
366 Figure 2 E).

367 When comparing the difference between SHR and WKY rat pups, there were age-  
368 specific differences in the number of newly proliferated BrdU/OX-ir neurons in the  
369 hypothalamus ( $P \leq 0.01$ ; Two-way ANOVA with Holm-Sidak analysis, age and strain as  
370 factors; Figure 2 E). P5-9 ( $878 \pm 112$ ) and P10-14 ( $956 \pm 208$ ) SHR pups had significantly  
371 more BrdU/OX-ir neurons in the hypothalamus than that of age matched WKY rat pups  
372 ( $355 \pm 50$  &  $538 \pm 106$ , respectively), ( $P=0.02$  &  $P=0.015$ , respectively; Two-way ANOVA  
373 with Holm-Sidak analysis; Figure 2 E). The primary difference in the number of newly  
374 proliferated orexin neurons was in the hypothalamic PeF zone, where P5-9 ( $644 \pm 181$ ) and  
375 P10-14 ( $701 \pm 169$ ) injected SHR pups had significantly more BrdU/OX-ir neurons than  
376 that of age-matched WKY rat pups ( $248 \pm 50$  &  $345 \pm 66$ , respectively), ( $P=0.002$  &  $0.007$ ,  
377 respectively; Two-way ANOVA with Holm-Sidak analysis; Figure 2 E). There was also a  
378 small but significant difference in the number of BrdU/OX-ir neurons in the DMH zone  
379 between P5-9 injected SHR ( $127 \pm 30$ ) and WKY rat ( $49 \pm 12$ ) pups ( $P=0.017$ ; Two-way

380 ANOVA with Holm-Sidak analysis). There was no difference in the number of BrdU/OX-  
381 ir neurons in the Hyp or any of three hypothalamic zones between P15-19 BrdU injected  
382 SHR and WKY rat pups ( $P>0.05$ ; Two-way ANOVA with Holm-Sidak analysis). No  
383 significant difference was observed in the LHA zone between SHR and WKY rat pups at  
384 any of the three ages studied ( $P>0.05$ ; Two-way ANOVA with Holm-Sidak analysis;  
385 Figure 2 E).

386 It is worth noting that all brains from P5-9 BrdU injected SHR and WKY rats were  
387 harvested between P12-14, in which BrdU-ir marked neurons were generated between P5-  
388 9 while co-stained OXA marked OX neurons that were between P5-P14 old. Nevertheless,  
389 even when combining BrdU/OX-ir from both P5-9 and P10-14 injected rats there is clearly  
390 more newly proliferated OX (BrdU/OX-ir) neurons in the hypothalamus in P5-9 and P10-  
391 14 BrdU injected SHRs than age-matched WKY rats. BrdU is commonly used to identify  
392 newly proliferating cells in the brain (Miller & Nowakowski, 1988; Cameron & McKay,  
393 2001; Menyhárt *et al.*, 2016; Chang *et al.*, 2008, 2012, 2013), and multiple 50 mg kg<sup>-1</sup>  
394 injections (i.p.) of BrdU can specifically and sufficiently label newly generated neurons  
395 (Wojtowicz & Kee, 2006) (Cameron & McKay, 2001)(Miller & Nowakowski, 1988;  
396 Takahashi *et al.*, 1992).

397

398 *Experiment 3: Chronological relationship between development of excess OX neurons and*  
399 *higher ABP in SHRs*

400 Developmental changes of ABP were accessed in SHRs and their normotensive controls at  
401 P15, P20, P25, and P30 to determine its chronological relationship with excess OX  
402 neurons during postnatal development (*Figure 3*). The general conditions are similar  
403 between age matched SHRs and their background normotensive control WKY pups. There  
404 were age-related increases in body weight in both SHRs and WKY rats, however there  
405 were no significant differences in body weight between the two strains at any age ( $P>0.05$ ;  
406 Table 1). Mean ABP of SHR and WKY rat pups in wakefulness and sleep at P15, P20, P25  
407 and P30 are shown in Figure 3.

408 Both SHRs and WKY rats experienced postnatal developmental increases in ABP  
409 ( $P<0.001$ ; Two-way ANOVA, age and strain as factors; Figure 3). In SHR pups, an age-

410 dependent increase in ABP was observed in both wakefulness and sleep among the age  
411 groups, P15 ( $55.4 \pm 1.0$  and  $52.7 \pm 1.7$  mmHg, respectively), P20 ( $74.8 \pm 2.5$  and  $73.1 \pm$   
412  $2.5$  mmHg, respectively), P25 ( $81.6 \pm 2.3$  and  $79.3 \pm 2.2$  mmHg, respectively), and P30  
413 ( $92.3 \pm 2.2$  and  $90.4 \pm 2$  mmHg, respectively), ( $P < 0.001$ ; Two-way ANOVA with Holm-  
414 Sidak analysis, Figure 3). In normotensive WKY rat pups, mean ABP also rose with age,  
415 and there were significant differences between age P30 and P15, P20, and P25 ( $P \leq 0.011$ ),  
416 however the change was much smaller compared to age matched SHR (Figure 3)(Two-  
417 way ANOVA with Holm-Sidak analysis).

418 Between SHR and WKY rat pups, there was an age-dependent difference in mean  
419 ABP during the developmental period studied, and there was a statistically significant  
420 interaction between age and strain (SHR vs WKY) in wakefulness ( $P = 0.003$ ) and sleep  
421 ( $P = 0.002$ ), (Two-way ANOVA with Holm-Sidak analysis, age and strain as factors). At  
422 P15, there was no significant difference in resting mean ABP in wakefulness and NREM  
423 sleep between SHRs ( $55.4 \pm 1.0$  &  $52.7 \pm 1.7$  mmHg, respectively) and WKY rats ( $62.4 \pm$   
424  $3.6$  &  $61.6 \pm 3.9$  mmHg, respectively), ( $P \geq 0.05$ ; Two-way ANOVA with Holm-Sidak  
425 analysis). At P20, a small but significant difference in mean ABP between SHR and WKY  
426 rat pups emerged, and mean ABP in wakefulness and sleep, respectively, was  $74.8 \pm 2.5$   
427 and  $73.1 \pm 2.5$  mmHg in SHR vs  $66.9 \pm 4.4$  and  $62.4 \pm 3.7$  mmHg in WKY rats ( $P = 0.042$   
428 and  $0.017$ , respectively; Two-way ANOVA with Holm-Sidak analysis). The difference in  
429 mean ABP between SHR and WKY rat pups magnified with age, and mean ABP in  
430 wakefulness in SHR and WKY rat pups was  $81.6 \pm 2.3$  vs  $67.5 \pm 2.4$  mmHg, respectively,  
431 at P25, and  $92.3 \pm 2.2$  vs  $77.4 \pm 2.3$  mmHg, respectively, at P30 (Figure 3;  $P < 0.001$ ; Two-  
432 way ANOVA with Holm-Sidak analysis). A similar age-dependent difference in mean  
433 ABP in NREM sleep between SHR and WKY rat pups was also observed (Figure 3A).

434 The chronological relationship between surges of OX neurons and ABP in SHRs vs  
435 age-matched WKY are shown in Figure 3-B. In SHRs, the surge in number of OX neurons  
436 emerged at P15, about 5 days prior to the aberrant rise in ABP, which suggests that  
437 increased OX activity may be necessary for developing a higher blood pressure in SHRs  
438 during postnatal development.

439



440 *Experiment 4: The effects of eliminating excess orexin neurons on ABP and ventilatory*  
441 *chemoreflex*

442 To determine whether excess OX activity is necessary in developing hypertension during  
443 development we evaluated the effects of eliminating some OX-neurons via Hcrt-SAP on  
444 ABP and ventilatory hypercapnic chemoreflex in SHR during a developmental period  
445 (Figures 4-5).

446 Ages and body weights at time of injection and at the time of the physiology  
447 experiment are recorded in Table 2. There were no significant differences in the age of  
448 injection between Hcrt-SAP and IgG-SAP injected SHR (26.2 ± 0.5 vs 27.2 ± 0.6,  
449 respectively), body weight at injection (56.1 ± 2.6 vs 52.7 ± 3.6, respectively), age at time  
450 of physiology experiment (38.2 ± 0.5 vs 39.2 ± 0.6, respectively), or body weight at time  
451 of physiology experiment (90.4 ± 4.4 vs 82.2 ± 5.8, respectively). Physiology experiments  
452 were completed exactly 12-days post-lesion for each individual animal with injection ages  
453 ranging from P25-P28 and experimental ages ranging from P37-P40.

454 *Efficacy of eliminating excess OX neurons.* The representative images of Hcrt-SAP  
455 injected and non-injected hemispheres in a SHR are shown in Figure 4-A, and the  
456 quantified effect of Hcrt-SAP on number of OX neurons are shown in Figure 4B-C.

457 To determine the number of remaining OX neurons in the hypothalamus, the number  
458 of OX neurons were compared between the injected and non-injected hemisphere in the  
459 same SHR. In IgG-SAP injected control SHR, there was a very small decrease in number  
460 of OX neurons in the injected hemisphere relative to the non-injected hemisphere, however  
461 the loss was not statistically significant ( $P > 0.05$ , two-way ANOVA) and was likely due to  
462 mechanical injury during the injection procedure (Figure 4C left panel). While in Hcrt-  
463 SAP injected SHR, there was a significant decrease in total number of OX neurons  
464 resulting from the Hcrt-SAP lesion in injected hemisphere vs non-injected hemisphere in  
465 Hyp (~488 vs 1417, respectively) and PeF zone (285 vs 918, respectively) ( $P \leq 0.001$ , two-  
466 way ANOVA with treatment and region as factors; Figure 4C, right panel).

467 When comparing the cell loss in the injected hemisphere *between Hcrt-SAP and IgG-*  
468 *SAP injected SHR* the percentage loss of OX neurons was calculated by dividing the total  
469 number of remaining OX-ir neurons in the injected hemisphere over the total number of

470 OX-ir neurons in the non-injected hemisphere. In the injected hemisphere, Hcrt-SAP  
471 injected SHR<sub>s</sub> lost significantly more OX neurons than IgG-SAP injected control SHR<sub>s</sub> in  
472 the hypothalamus ( $63.3 \pm 10\%$  vs  $21.4 \pm 4\%$ , respectively,  $P=0.002$ ), and three  
473 hypothalamic zones, DMH, PeF, and LHA ( $52.2\%$  vs  $15.2\%$ ;  $65.8\%$  vs  $21.3\%$ ; and  $60.8\%$   
474 vs  $25.5\%$ , respectively,  $P \leq 0.05$ , Two-way ANOVA with Holm-Sidak multiple  
475 comparisons, *Figure 4B*). Additionally, we estimated the total loss of OX neurons in the  
476 whole brain based on the assumption that both hemispheres have an equal number of OX  
477 neurons if there was no injection. Thus, the total percentage loss of OX neurons in the  
478 whole brain would be equal to  $\frac{1}{2}$  of the percent loss of OX in the injected hemisphere  
479 mentioned above. In Hcrt-SAP injected SHR<sub>s</sub>, the estimated total percent loss of OX  
480 neurons in the brain was 31.6%, which is half of percentage loss of injected hemisphere  
481 (63%), versus 10.7% in IgG-SAP control SHR<sub>s</sub> ( $P=0.002$ , two-way ANOVA with *Holm-*  
482 *Sidak multiple* comparisons). This number is relevant, as previous studies have shown that  
483 SHR<sub>s</sub> have  $\sim 30\%$  more OX neurons than age-matched normotensive controls.  
484 *The effects of eliminating excess OX neurons on resting ABP:* The effects of elimination  
485 of excess OX neurons on resting ABP and both ventilatory and ABP response to  
486 hypercapnic challenge are shown in Figure 5. During the dark period in room air condition,  
487 Hcrt-SAP lesioned SHR<sub>s</sub> had a significantly lowered mean ABP compared to IgG-SAP  
488 control SHR<sub>s</sub> in NREM sleep ( $97 \pm 2$  vs  $112 \pm 6$ , respectively;  $P=0.006$ ) and QW ( $108 \pm 1$  vs  
489  $122 \pm 5$ , respectively;  $p=0.015$ ) (Two-way ANOVA with Holm-Sidak multiple  
490 comparisons; Figure 5A). Similar results were found in the light period where Hcrt-SAP  
491 lesioned SHR<sub>s</sub> also had a lower mean ABP than IgG-SAP control SHR<sub>s</sub> in NREM sleep  
492 ( $98.9 \pm 2.2$  vs  $109.8 \pm 5.1$ , respectively;  $P=0.031$ ) and QW ( $105.8 \pm 0.9$  vs  $117.1 \pm 4.4$ ,  
493 respectively;  $P=0.026$ ), (Two-way ANOVA with Holm-Sidak multiple comparisons;  
494 Figure 5A).

495 *The effects of eliminating excess OX neurons on ABP and ventilatory responses to*  
496 *hypercapnia:* The ABP response to hypercapnia ( $5\% \text{CO}_2$ ) describes the ABP in the first 5  
497 minutes after  $\text{CO}_2$  reached 4%. Mean ABP was significantly lower in Hcrt-SAP lesioned  
498 SHR<sub>s</sub> than IgG-SAP control SHR<sub>s</sub> in QW ( $107.9 \pm 1.9$  vs  $120.6 \pm 1.7$ , respectively;  
499  $P < 0.01$ , mixed-effects analysis with Sidak's multiple comparisons) in both resting (room-

500 air) and hypercapnic (5%CO<sub>2</sub>) conditions (Figure 5C). However, there was no significant  
501 difference in the change of ABP in response to CO<sub>2</sub> between lesioned and control SHR  
502 (Figure 5C). In terms of the ventilatory response to hypercapnia, Hcrt-SAP lesioned SHR  
503 had a significantly lower ventilatory response to hypercapnia (5% CO<sub>2</sub>) than IgG-injected  
504 control SHR in QW ( $61.6 \pm 11.5$  vs  $89.5 \pm 4.5$ , respectively,  $P < 0.05$  mixed-effects  
505 analysis with Sidak's multiple comparisons, Figure 5), but not in NREM sleep ( $50.6 \pm 6.0$   
506 vs  $59.4 \pm 6.2$ , respectively). The decreased CO<sub>2</sub> chemoreflex was primarily contributed by  
507 a change of tidal volume (data not shown).

508 **Discussion**

509 An overactive orexin system has been recently linked to neurogenic hypertension in adult  
510 SHR (Lee *et al.*, 2013; Li *et al.*, 2013, 2016), however, the existence of a chronological  
511 relationship between the increased orexin activity and ABP and exaggerated OX  
512 neurogenesis during postnatal development was unknown until now. Here, we  
513 demonstrated that 1) postnatal orexin activity, marked by the number of OX-peptide  
514 positive neurons, surged to an abnormally high level in hypertensive rats compared to age-  
515 matched normotensive WKY controls by the age of P15, which was about 5 days prior to a  
516 measurable divergence of mean ABP between SHRs and WKY rats at ~P20; 2)  
517 exaggerated postnatal orexin neurogenesis was the primary contributor to the excess OX  
518 neurons in the hypothalamus during postnatal development; and 3) eliminating excess OX  
519 neurons in the hypothalamus can prevent the development of a higher ABP and  
520 exaggerated hypercapnic chemoreflex in SHRs during a postnatal period (P25-40). The  
521 fact that a surge in the number of OX neurons occurs before an aberrant increase in mean  
522 ABP and that elimination of excess OX neurons can prevent developing a higher ABP  
523 during a postnatal developmental period suggests that the orexin system may play an  
524 important role in the development of neurogenic hypertension. We further suggest that an  
525 overactive orexin system may be necessary in developing neurogenic hypertension in  
526 SHRs, and modulation of such an overactive system may be beneficial in treating  
527 hypertension.

528

529 Postnatal development of excess OX neurons via exaggerated OX neurogenesis in SHRs

530 Development and maturation of the orexin system occurs during late embryonic and early  
531 postnatal periods in normal rodents (Van den Pol *et al.*, 2001; Steininger *et al.*, 2004;  
532 Amiot *et al.*, 2005; Sawai *et al.*, 2010; Stoyanova *et al.*, 2010; Iwasa *et al.*, 2015). Early *in*  
533 *situ* hybridization studies showed that *prepro-orexin* mRNA expression is first seen  
534 between E12-18 (Steininger *et al.*, 2004; Amiot *et al.*, 2005) and the levels of expression  
535 progressively increase until about P30, at which age it remains stable into adulthood  
536 (Yamamoto *et al.*, 2000; Iwasa *et al.*, 2015). The number of orexin neurons, marked by the  
537 expression of either *prepro-orexin* mRNA or orexin-A and/or -B peptide, progressively

538 increases in normal animals during postnatal development (Steininger *et al.*, 2004; Sawai  
539 *et al.*, 2010; Ogawa *et al.*, 2017). In adult hypertensive rodents, it has been previously  
540 reported that spontaneously hypertensive rats and mice have about 30 and 20% more OX-ir  
541 neurons, respectively, than their age-matched normotensive controls (Clifford *et al.*, 2015;  
542 Jackson *et al.*, 2016; Li *et al.*, 2016). We further reported that such increase in orexin  
543 activity can be observed in a pre-hypertension period at P30-58 in young SHR rats (Li *et al.*,  
544 2016). However, it was not clear whether SHR rats were born with excess OX neurons or if  
545 the excess population developed postnatally.

546 In this study, we found that SHR rats and normotensive WKY rats had similar numbers of  
547 OX neurons at P7-8, however by P15, SHR rats started to have significantly more OX neurons  
548 than age-matched normotensive controls (Figure 1). These data suggest that SHR pups  
549 experienced an exaggerated surge in the total number of OX neurons postnatally between  
550 P7 and P16, which is primarily contributed by increased OX neurogenesis. Compared to  
551 age-matched normotensive WKY pups, SHR pups had significantly more newly  
552 proliferated OX neurons, which were positive for both BrdU and OXA (BrdU/OX-ir), in  
553 the hypothalamus during two of the studied age periods (P5-9 and P10-14) (Figure 2). SHR  
554 pups had ~1245 more OX-ir neurons in the hypothalamus than age-matched WKY rat pups  
555 at P15, of which ~74% (~941) were contributed by newly proliferated BrdU/OX-ir neurons  
556 from combined P5-9 and P10-14 neurogenesis, and the remaining 26% were likely  
557 contributed by the maturation of existing OX neurons during the same period. It is also  
558 important to emphasize that these newly proliferated OX neurons are functional as  
559 evidenced by their production of orexin neuropeptide identified via positive  
560 immunohistochemical staining for orexin-A, similar to a previous report in 8 week old rats  
561 (Xu *et al.*, 2005).

562 Emerging evidence shows that postnatal and adult neurogenesis are present in the  
563 hypothalamus (Xu *et al.*, 2005; Kokoeva *et al.*, 2005; Rojczyk-Gołębiewska *et al.*, 2014;  
564 Sousa-Ferreira *et al.*, 2014) and  $\alpha$ -tanycytes are likely the neural progenitor cells for  
565 generating peptidergic neurons, e.g., orexin neurons, in the hypothalamus (Xu *et al.*, 2005;  
566 Lee, 2012; Rizzoti & Lovell-Badge, 2017). Using BrdU, Amiot *et al.* demonstrated that  
567 most orexin neurons are generated between embryonic days 11 and 14 (Amiot *et al.*,

568 2005), while others showed that orexin neurogenesis in the hypothalamus persists post-E14  
569 and into adulthood (Xu *et al.*, 2005; Chang *et al.*, 2012, 2013). Xu *et al.* further showed  
570 that hypothalamic BrdU-identified neurogenesis persists into postnatal 8 weeks of age, and  
571 they determined that some of the BrdU-positive neurons expressed orexin (Xu *et al.*,  
572 2005).

573 It is currently unknown what may cause this surge; however, we can speculate that  
574 genetic predisposition combined with early postnatal triggers may play a role. Many  
575 studies have identified single nucleotide polymorphisms that, when taken together,  
576 significantly contribute to hypertension (Pravenec & Kurtz, 2010; Natekar *et al.*, 2014).  
577 McCarty and Lee further showed that SHR pups that were cross fostered by WKY dams  
578 had significantly lower ABP than SHRs reared by their own mother. On the other hand,  
579 WKY pups that were cross-fostered by an SHR dam had no change in their ABP (McCarty  
580 & Lee, 1996). These data suggest that while the genetic factors are essential to the  
581 development of higher ABP in postnatal development, some aspect of the postnatal  
582 development of SHRs is more stressed and serves as a secondary trigger that is also  
583 required for the development of a higher ABP. SHR dams have been shown to have  
584 increased stress levels, increased tactile stimulation of the pups, altered nutrient exchange  
585 during lactation, excessive grooming, and restlessness – all of which could be or contribute  
586 to this secondary trigger (McCarty & Kopin, 1978; Tucker & Johnson, 1981; Myers *et al.*,  
587 1989; McCarty *et al.*, 1992; Krukoff *et al.*, 1999). Additionally, chronic stress, e.g. foot-  
588 shock, can induce hypertension and double the number of OX neurons in the hypothalamus  
589 in rats (Xiao *et al.*, 2013). It is possible that a polygenic predisposition accompanied by  
590 prenatal and/or postnatal exposures to increased levels of stress produce an additive effect  
591 that leads to the exaggerated OX neurogenesis. The orexin system is associated with  
592 hyperarousal, anxiety/stress, and autonomic functions (Kayaba *et al.*, 2003; Furlong *et al.*,  
593 2009; Huang *et al.*, 2010; Johnson *et al.*, 2010; Nattie & Li, 2010) and this early surge of  
594 OX activity in SHRs may produce aberrant excitatory drive to many cardiovascular-related  
595 nuclei in the brainstem and spinal cord and facilitate the pathological development of  
596 hypertension in SHRs.

597

598 Relationship between surge in OX activity and ABP during development in SHR

599 The chronological relationship between increased OX activity and ABP in SHR during  
600 development was largely unknown. It is known that ABP increases progressively and  
601 rapidly from newborn (~15-25mmHg) through the first three weeks of life (~80-90mmHg)  
602 in normotensive rats (Zicha & Kunes, 1999). Similar to these previous reports, in this  
603 study, we have found that SHR pups have comparable mean ABP and systolic blood  
604 pressure (SBP) to the background normotensive WKY rat pups during the first two weeks  
605 of life (Figure 3) (Friberg *et al.*, 1989; Dickhout & Lee, 1998; Zicha & Kunes, 1999; Nagai  
606 *et al.*, 2003; Li *et al.*, 2013). Around 3-4 weeks of age a measurable difference in ABP  
607 between SHR and WKY rat pups emerges and the divergence of ABP between the two  
608 strains escalates between weeks 4 and 12 (Lais & Brody, 1977; Friberg *et al.*, 1989;  
609 Dickhout & Lee, 1998; Zicha & Kunes, 1999; Nagai *et al.*, 2003). Using a telemetric  
610 method in conscious animals, we confirmed that by P20, a small but significant difference  
611 in mean ABP began to emerge between SHR and WKY rat pups in both wakefulness and  
612 sleep (Figure 3). As discussed above, in SHR, the number of OX neurons surges to  
613 significantly higher than normotensive controls by P15-16, which is about five days prior  
614 the emergence of the difference in mean ABP between SHR and normotensive WKY pups  
615 (Figure 1 & 3). Even though at this point it is unclear the exact mechanism of such a  
616 chronological relationship between increased OX activity and ABP, the closely associated  
617 sequential events suggest a potential causal role for the OX system in developing  
618 hypertension in SHR. We speculate that the early surge of orexin signaling may provide  
619 excess, and necessary, excitatory drive to many cardiorespiratory-related nuclei in the  
620 brainstem and sympathetic preganglionic neurons in the spinal cord to increase SNA,  
621 which creates a perfect stage for developing hypertension in SHR during postnatal  
622 development.

623

624 Effects of eliminating excess orexin neurons on ABP and CO<sub>2</sub> chemoreflex in SHR

625 In addition to higher ABP and exaggerated CO<sub>2</sub> chemoreflex, SHR also have ~30% more  
626 orexin neurons than normotensive control WKY rats at two ages, P30-58 and adult (Li *et*  
627 *al.*, 2016). Here we further showed that excess OX neurons and higher ABP in SHR

628 emerges in a sequential order during postnatal development at P15 and P20, respectively.  
629 If excess OX neurons are necessary for developing and/or maintaining a higher ABP  
630 during postnatal development, then elimination of the excess OX neurons in the  
631 hypothalamus may be beneficial in preventing or reducing the aberrant increase in ABP  
632 during this period. To test this hypothesis, we selectively eliminated some of the OX  
633 neurons using Hcrt-SAP in a subset of SHRs from P25-28, and compared their ABP and  
634 CO<sub>2</sub> chemoreflex with non-lesioned SHR controls 12 days post-lesion at P37-40. The  
635 result that eliminating ~30% OX neurons was sufficient to prevent these OX-lesioned  
636 SHRs from developing higher ABP and exaggerated CO<sub>2</sub> chemoreflex during a postnatal  
637 developmental period (P37-40; Figure 4-5), in one way, confirms that excess OX neurons  
638 may be necessary in developing higher ABP and exaggerated CO<sub>2</sub> chemoreflex in SHRs  
639 during this developmental period.

640 On average, the lesioned-SHRs without excess OX neurons had an ABP that was ~14  
641 mmHg lower than non-lesioned SHRs with excess OX neurons (121 vs 107 mmHg in  
642 wakefulness during dark period) at P37-40. The change was similar to that found with  
643 OXR blockade in SHRs (Li et al., 2016), where OXR blocker significantly lowered ABP  
644 from 121 to 103 mmHg, a level similar to that of WKY rats at the same age (99 mmHg).  
645 Although we did not directly compare the ABP of lesioned-SHRs with normotensive  
646 WKY rats, our results, combined with previously published reports, suggest that the ABP  
647 resultant from excess OX neuron elimination is comparable to the expected ABP of WKY  
648 rats at the same age.

649 In terms of CO<sub>2</sub> chemoreflex, we previously showed that SHRs have elevated  
650 ventilatory and ABP responses to hypercapnia at young (P30-58) and adult ages and that  
651 treating with OXR blocker can normalize such exaggerated CO<sub>2</sub> chemoreflex in SHRs in  
652 wakefulness and sleep. Here, we found that the lesioned-SHRs without excess OX  
653 neurons had a significantly lower ventilatory response to hypercapnia than non-lesioned  
654 rats with excess OX neurons only in wakefulness (Figure 5B). We speculate that the  
655 vigilance state-dependency found here could be contributed by 1) a proven effect of  
656 Almorexant to promote sleep, 2) possible developmental differences between OX neurons  
657 and OXRs during postnatal developmental period, and 3) methodological differences in



658 OX system modulation, e.g. elimination of OX neurons vs blockade of OXRs. Eliminating  
659 excess OX neurons will result in loss of other neuropeptides that are also produced by OX  
660 neurons, e.g., dynorphin (Chou *et al.*, 2001), even though at this point the role of  
661 dynorphin on ABP remains unclear. Of course, a long-term study on the effect of  
662 eliminating excess OX neurons or orexin peptide on ABP and CO<sub>2</sub> chemoreflex in the  
663 future may further provide therapeutic significance in human hypertension.  
664

665 **References**

- 666 Amiot C, Brischox F, Colard C, La Roche A, Fellmann D & Risold PY (2005).  
667 Hypocretin/ orexin-containing neurons are produced in one sharp peak in the  
668 developing ventral diencephalon. *Eur J Neurosci* **22**, 531–534.
- 669 Antunes VR, Brailoiu GC, Kwok EH, Scruggs P & Dun NJ (2001). Orexins/hypocretins  
670 excite rat sympathetic preganglionic neurons in vivo and in vitro. *Am J Physiol -*  
671 *Regul Integr Comp Physiol* **281**, R1801–R1807.
- 672 Azar S, Meyer MW & Myers J (1986). Umbilical blood pressures and utero-placental  
673 blood flow in spontaneously hypertensive rats. *J Hypertens Suppl* **4**, S369-71.
- 674 Calkins K & Devaskar SU (2011). Fetal origins of adult disease. *Curr Probl Pediatr*  
675 *Adolesc Health Care* **41**, 158–176.
- 676 Cameron HA & McKay RDG (2001). Adult neurogenesis produces a large pool of new  
677 granule cells in the dentate gyrus. *J Comp Neurol* **435**, 406–417.
- 678 Chang G-Q, Karatayev O & Leibowitz SF (2013). Prenatal exposure to nicotine stimulates  
679 neurogenesis of orexigenic peptide-expressing neurons in hypothalamus and  
680 amygdala. *J Neurosci* **33**, 13600–13611.
- 681 Chang GQ, Karatayev O, Liang SC, Barson JR & Leibowitz SF (2012). Prenatal ethanol  
682 exposure stimulates neurogenesis in hypothalamic and limbic peptide systems:  
683 Possible mechanism for offspring ethanol overconsumption. *Neuroscience* **222**, 417–  
684 428.
- 685 Chiueh CC & Kopin IJ (1978). Hyperresponsivity of spontaneously hypertensive rat to  
686 indirect measurement of blood pressure. *Am J Physiol* **234**, H690-5.
- 687 Chou TC, Lee CE, Lu J, Elmquist JK, Hara J, Willie JT, Beuckmann CT, Chemelli RM,  
688 Sakurai T, Yanagisawa M, Saper CB & Scammell TE (2001). Orexin ( hypocretin )  
689 neurons contain dynorphin. *JN* **21**, 1–6.
- 690 Clifford L, Dampney BW & Carrive P (2015). Spontaneously hypertensive rats have more  
691 orexin neurons in their medial hypothalamus than normotensive rats. *Exp Physiol*  
692 **100.4**, 388–398.
- 693 Cummings KJ, Li A & Nattie EE (2011). Brainstem serotonin deficiency in the neonatal  
694 period: autonomic dysregulation during mild cold stress. *J Physiol* **589**, 2055–2064.

- 695 Dickhout JG & Lee RM (1998). Blood pressure and heart rate development in young  
696 spontaneously hypertensive rats. *Am J Physiol* **274**, H794–H800.
- 697 Friberg P, Karlsson B & Nordlander M (1989). Autonomic control of the diurnal variation  
698 in arterial blood pressure and heart rate in spontaneously hypertensive and Wistar-  
699 Kyoto rats. *J Hypertens* **7**, 799–807.
- 700 Furlong TM, Vianna DML, Liu L & Carrive P (2009). Hypocretin/orexin contributes to the  
701 expression of some but not all forms of stress and arousal. *Eur J Neurosci* **30**, 1603–  
702 1614.
- 703 Huang S-C, Dai Y-WE, Lee Y-H, Chiou L-C & Hwang L-L (2010). Orexins depolarize  
704 rostral ventrolateral medulla neurons and increase arterial pressure and heart rate in  
705 rats mainly via orexin 2 receptors. *J Pharmacol Exp Ther* **334**, 522–529.
- 706 Iwasa T, Matsuzaki T, Munkhzaya M, Tungalagsuvd A, Kuwahara A, Yasui T & Irahara  
707 M (2015). Developmental changes in the hypothalamic mRNA levels of prepro-  
708 orexin and orexin receptors and their sensitivity to fasting in male and female rats. *Int*  
709 *J Dev Neurosci* **46**, 51–54.
- 710 Jackson KL, Dampney BW, Moretti J-LL, Stevenson ER, Davern PJ, Carrive P & Head  
711 GA (2016). Contribution of orexin to the neurogenic hypertension in BPH/2J mice.  
712 *Hypertension* **67**, 959–969.
- 713 Johnson PL, Truitt W, Fitz SD, Minick PE, Dietrich A, Sanghani S, Träskman-Bendz L,  
714 Goddard AW, Brundin L & Shekhar A (2010). A key role for orexin in panic anxiety.  
715 *Nat Med* **16**, 111–115.
- 716 Kayaba Y, Nakamura A, Kasuya Y, Ohuchi T, Yanagisawa M, Komuro I, Fukuda Y &  
717 Kuwaki T (2003). Attenuated defense response and low basal blood pressure in orexin  
718 knockout mice. *Am J Physiol Regul Integr Comp Physiol* **285**, R581–R593.
- 719 Kokoeva M V, Yin H & Flier JS (2005). Neurogenesis in the hypothalamus of adult mice:  
720 potential role in energy balance. *Science* **310**, 679–683.
- 721 Krukoff TL, MacTavish D & Jhamandas JH (1999). Hypertensive rats exhibit heightened  
722 expression of corticotropin-releasing factor in activated central neurons in response to  
723 restraint stress. *Mol Brain Res* **65**, 70–79.
- 724 Lais L & Brody M (1977). Pathogenesis of hypertension in spontaneously hypertensive

- 725 rats. *Spectr New York*.
- 726 Lee D (2012). *Identification and Characterization of Neural Progenitors in the*  
727 *Mammalian Hypothalamus* (thesis). Johns Hopkins University. Available at:  
728 [https://search.proquest.com/openview/a0e230ea486e017ef393410f7e5cb42b/1?pq-](https://search.proquest.com/openview/a0e230ea486e017ef393410f7e5cb42b/1?pq-origsite=gscholar&cbl=18750&diss=y)  
729 [origsite=gscholar&cbl=18750&diss=y](https://search.proquest.com/openview/a0e230ea486e017ef393410f7e5cb42b/1?pq-origsite=gscholar&cbl=18750&diss=y) [Accessed September 30, 2018].
- 730 Lee Y-H, Dai Y-WE, Huang S-C, Li T-L & Hwang L-L (2013). Blockade of central orexin  
731 2 receptors reduces arterial pressure in spontaneously hypertensive rats. *Exp Physiol*  
732 **98**, 1145–1155.
- 733 Lee Y, Tsai M, Li T, Dai YE, Huang S, Hwang L, Medical T & Hwang L (2015). SHR  
734 have more orexin neurons in the hypothalamus and enhanced orexinergic input and  
735 orexin 2 receptor-associated nNOS signaling in the RVLM. *Exp Physiol* **100**, 993–  
736 1007.
- 737 Li A, Emond L & Nattie E (2008). Brainstem Catecholaminergic Neurons Modulate both  
738 Respiratory and Cardiovascular Function. In, pp. 371–376. Springer, New York, NY.  
739 Available at: [http://link.springer.com/10.1007/978-0-387-73693-8\\_65](http://link.springer.com/10.1007/978-0-387-73693-8_65) [Accessed May  
740 30, 2018].
- 741 Li A, Hindmarch CCT, Nattie EE & Paton JFR (2013). Antagonism of orexin receptors  
742 significantly lowers blood pressure in spontaneously hypertensive rats. *J Physiol* **591**,  
743 4237–4248.
- 744 Li A & Nattie E (2006). Catecholamine neurones in rats modulate sleep, breathing, central  
745 chemoreception and breathing variability. *J Physiol* **570**, 385–396.
- 746 Li A & Nattie E (2014). Orexin, cardio-respiratory function, and hypertension. *Front*  
747 *Neurosci* **8**, 22.
- 748 Li A, Roy SH & Nattie EE (2016). An augmented CO<sub>2</sub> chemoreflex and overactive orexin  
749 system are linked with hypertension in young and adult spontaneously hypertensive  
750 rats. *J Physiol* **594**, 1–14.
- 751 Marcus JN, Aschkenasi CJ, Lee CE, Chemelli RM, Saper CB, Yanagisawa M & Elmquist  
752 JK (2001). Differential expression of orexin receptors 1 and 2 in the rat brain. *J Comp*  
753 *Neurol* **435**, 6–25.
- 754 McCarty R & Kopin IJ (1978). Alterations in plasma catecholamines and behavior during

- 755 acute stress in spontaneously hypertensive and Wistar-Kyoto normotensive rats. *Life*  
756 *Sci* **22**, 997–1005.
- 757 McCarty R & Lee JH (1996). Maternal influences on adult blood pressure of SHRS: A  
758 single pup cross-fostering study. *Physiol Behav* **59**, 71–75.
- 759 McCarty R, Tong H & Forsythe RC (1992). Electrolyte content of milk differs in  
760 normotensive and spontaneously hypertensive rats. *Psychobiology* **20**, 307–310.
- 761 Menyhárt O, Harami-Papp H, Sukumar S, Schäfer R, Magnani L, De Barrios O & Gy" B  
762 (2016). Guidelines For The Selection of Functional Assays To Evaluate The  
763 Hallmarks of Cancer. *Biochim Biophys Acta* **1866**, 300–319.
- 764 Miller MW & Nowakowski RS (1988). Use of bromodeoxyuridine-immunohistochemistry  
765 to examine the proliferation, migration and time of origin of cells in the central  
766 nervous system. *Brain Res* **457**, 44–52.
- 767 Myers MM, Brunelli SA, Squire JM, Shindeldecker RD & Hofer MA (1989). Maternal  
768 behavior of SHR rats and its relationship to offspring blood pressures. *Dev Psychobiol*  
769 **22**, 29–53.
- 770 Nagai R, Nagata S, Fukuya F, Higaki J, Rakugi H & Ogihara T (2003). Changes in  
771 autonomic activity and baroreflex sensitivity with the hypertension process and age in  
772 rats. *Clin Exp Pharmacol Physiol* **30**, 419–425.
- 773 Natekar A, Olds RL, Lau MW, Min K, Imoto K & Slavin TP (2014). Elevated blood  
774 pressure: Our family's fault? The genetics of essential hypertension. *World J Cardiol*  
775 **6**, 327–337.
- 776 Nattie E & Li A (2010). Central chemoreception in wakefulness and sleep: evidence for a  
777 distributed network and a role for orexin. *J Appl Physiol* **108**, 1417–1424.
- 778 Nattie EE, Li A, Richerson G & Lappi DA (2004). Medullary serotonergic neurones and  
779 adjacent neurones that express neurokinin-1 receptors are both involved in  
780 chemoreception in vivo. *J Physiol* **556**, 235–253.
- 781 Ogawa Y, Kanda T, Vogt K & Yanagisawa M (2017). Anatomical and  
782 electrophysiological development of the hypothalamic orexin neurons from embryos  
783 to neonates. *J Comp Neurol* **525**, 3809–3820.
- 784 Penatti E, Barina A, Schram K, Li A & Nattie E (2011). Serotonin transporter null male

- 785 mouse pups have lower ventilation in air and 5% CO<sub>2</sub> at postnatal ages P15 and P25.  
786 *Respir Physiol Neurobiol* **177**, 61–65.
- 787 Peyron C, Tighe DK, van den Pol AN, de Lecea L, Heller HC, Sutcliffe JG & Kilduff TS  
788 (1998). Neurons containing hypocretin (orexin) project to multiple neuronal systems.  
789 *J Neurosci* **18**, 9996–10015.
- 790 Van Den Pol AN (1999). Hypothalamic Hypocretin (Orexin): Robust Innervation of the  
791 Spinal Cord. *J Neurosci* **19**, 3171–3182.
- 792 Van den Pol AN, Patrylo PR, Ghosh PK & Gao XB (2001). Lateral hypothalamus: Early  
793 developmental expression and response to hypocretin (orexin). *J Comp Neurol* **433**,  
794 349–363.
- 795 Pravenec M & Kurtz TW (2010). Recent advances in genetics of the spontaneously  
796 hypertensive rat. *Curr Hypertens Rep* **12**, 5–9.
- 797 Rizzoti K & Lovell-Badge R (2017). Pivotal role of median eminence tanycytes for  
798 hypothalamic function and neurogenesis. *Mol Cell Endocrinol* **445**, 7–13.
- 799 Rojczyk-Gołębiewska E, Pałasz A & Wiaderkiewicz R (2014). Hypothalamic  
800 subependymal niche: A novel site of the adult neurogenesis. *Cell Mol Neurobiol* **34**,  
801 631–642.
- 802 Roman O, Seres J, Pometlova M & Jurcovicova J (2004). Neuroendocrine or behavioral  
803 effects of acute or chronic emotional stress in Wistar Kyoto (WKY) and  
804 spontaneously hypertensive (SHR) rats. *Endocr Regul* **38**, 151–155.
- 805 Samson WK, Gosnell B, Chang JK, Resch ZT & Murphy TC (1999). Cardiovascular  
806 regulatory actions of the hypocretins in brain. *Brain Res* **831**, 248–253.
- 807 Sawai N, Ueta Y, Nakazato M & Ozawa H (2010). Developmental and aging change of  
808 orexin-A and -B immunoreactive neurons in the male rat hypothalamus. *Neurosci Lett*  
809 **468**, 51–55.
- 810 Sei H, Sano A, Ohno H, Yamabe K, Nishioka Y, Sone S & Morita Y (2002). Age-Related  
811 Changes in Control of Blood Pressure and Heart Rate During Sleep in the Rat. *Sleep*  
812 **25**, 279–285.
- 813 Shahid IZ, Rahman AA & Pilowsky PM (2011). Intrathecal orexin A increases  
814 sympathetic outflow and respiratory drive, enhances baroreflex sensitivity and blocks

- 815 the somato-sympathetic reflex. *Br J Pharmacol* **162**, 961–973.
- 816 Shahid IZ, Rahman AA & Pilowsky PM (2012). Orexin A in rat rostral ventrolateral  
817 medulla is pressor, sympatho-excitatory, increases barosensitivity and attenuates the  
818 somato-sympathetic reflex. *Br J Pharmacol* **165**, 2292–2303.
- 819 Shirasaka T, Miyahara S, Kunitake T, Jin QH, Kato K, Takasaki M & Kannan H (2001).  
820 Orexin depolarizes rat hypothalamic paraventricular nucleus neurons. *Am J Physiol*  
821 *Regul Integr Comp Physiol* **281**, R1114–R1118.
- 822 Shirasaka T, Nakazato M, Matsukura S, Takasaki M & Kannan H (1999). Sympathetic and  
823 cardiovascular actions of orexins in conscious rats. *Am J Physiol - Regul Integr Comp*  
824 *Physiol* **277**, R1780–R1785.
- 825 Sousa-Ferreira L, Almeida LP de & Cavadas C (2014). Role of hypothalamic neurogenesis  
826 in feeding regulation. *Trends Endocrinol Metab* **25**, 80–88.
- 827 Steininger TL, Kilduff TS, Behan M, Benca RM & Landry CF (2004). Comparison of  
828 hypocretin/orexin and melanin-concentrating hormone neurons and axonal projections  
829 in the embryonic and postnatal rat brain. *J Chem Neuroanat* **27**, 165–181.
- 830 Stoyanova II, Rutten WLC & le Feber J (2010). Orexin-A and orexin-B during the  
831 postnatal development of the rat brain. *Cell Mol Neurobiol* **30**, 81–89.
- 832 Sun CL & Hanig JP (1983). Vascular reactivity to adrenergic agents and neuronal and  
833 vascular catecholamine levels in spontaneously hypertensive rats. *Pharmacology* **27**,  
834 319–324.
- 835 Takahashi T, Nowakowski RS & Caviness VS (1992). BUdR as an S-phase marker for  
836 quantitative studies of cytokinetic behaviour in the murine cerebral ventricular zone. *J*  
837 *Neurocytol* **21**, 185–197.
- 838 van den Top M, Nolan MF, Lee K, Richardson PJ, Buijs RM, Davies CH & Spanswick D  
839 (2003). Orexins induce increased Excitability and Synchronisation of Rat  
840 Sympathetic Preganglionic Neurones. *J Physiol* **549**, 809–821.
- 841 Trivedi P, Yu H, MacNeil DJ, Van der Ploeg LH. & Guan X-M (1998). Distribution of  
842 orexin receptor mRNA in the rat brain. *FEBS Lett* **438**, 71–75.
- 843 Tucker DC & Johnson AK (1981). Behavioral correlates of spontaneous hypertension.  
844 *Neurosci Biobehav Rev* **5**, 463–471.

- 845 Wojtowicz JM & Kee N (2006). BrdU assay for neurogenesis in rodents. ; DOI:  
846 10.1038/nprot.2006.224.
- 847 Wu TH, Kuo HC, Lin IC, Chien SJ, Huang LT & Tain YL (2014). Melatonin prevents  
848 neonatal dexamethasone induced programmed hypertension: Histone deacetylase  
849 inhibition. *J Steroid Biochem Mol Biol* **144**, 253–259.
- 850 Xiao F, Jiang M, Du D, Xia C, Wang J, Cao Y, Shen L & Zhu D (2013). Orexin A  
851 regulates cardiovascular responses in stress-induced hypertensive rats.  
852 *Neuropharmacology* **67**, 16–24.
- 853 Xu Y, Tamamaki N, Noda T, Kimura K, Itokazu Y, Matsumoto N, Dezawa M & Ide C  
854 (2005). Neurogenesis in the ependymal layer of the adult rat 3rd ventricle. *Exp Neurol*  
855 **192**, 251–264.
- 856 Yamamoto Y, Ueta Y, Hara Y, Serino R, Nomura M, Shibuya I, Shirahata A & Yamashita  
857 H (2000). Postnatal development of orexin/hypocretin in rats. *Mol Brain Res* **78**, 108–  
858 119.
- 859 Yang B & Ferguson A V. (2003). Orexin-A Depolarizes Nucleus Tractus Solitarius  
860 Neurons Through Effects on Nonselective Cationic and K<sup>+</sup> Conductances. *J*  
861 *Neurophysiol* **89**, 2167–2175.
- 862 Zicha J & Kunes J (1999). Ontogenetic aspects of hypertension development: analysis in  
863 the rat. *Physiol Rev* **79**, 1227–1282.
- 864



865 **Additional Information**

866 Competing Interests

867 None declared.

868

869 Author Contributions

870 All experiments were conducted at Geisel School of Medicine at Dartmouth. S.B. helped  
871 design experiments, performed cell counts, staining, BrdU experiments, and saporin  
872 experiments including physiology. RD. L.B., A.M., and J.Y. performed OX and BrdU  
873 immunostaining and OX cell counts at different ages; A.L.: designed all the experiments,  
874 performed physiology experiments for development data and data analysis. S.B. & A.L.  
875 wrote, revised and finalized the manuscript. All authors approved the final version of the  
876 manuscript and agree to be accountable for all aspects of the work in ensuring that  
877 questions related to the accuracy or integrity of any part of the work are appropriately  
878 investigated and resolved and that all persons designated as authors qualify for authorship,  
879 and all those who qualify for authorship are listed.

880

881 Funding

882 The study was supported by the National Heart, Lung, and Blood Institute (NHLBI), HL  
883 28066, and the Dartmouth UGAR.

884

885 Acknowledgements

886 The authors would like to thank Dartmouth undergraduate students Julia Stevenson, Jade  
887 Yen, Emily Chen, and Armin Tavakkoli, for their assistance.

888 **Table 1. Body weight at each age in experimental 3**

|            | <b>P15</b>   | <b>P20</b>   | <b>P25</b>   | <b>P30</b>    |
|------------|--------------|--------------|--------------|---------------|
| <b>SHR</b> | 22.91±1.46 g | 34.72±8.11 g | 41.76±8.87 g | 59.34±11.22 g |
| <b>WKY</b> | 32.34±3.61 g | 33.37±3.63 g | 40.20±7.87 g | 56.20±9.81 g  |

889 Body weight at P15, P20, P25 and P30 of SHR and WKY rat pups used in Experiment 3.

890 Both SHR and WKY rat pups had age-dependent increase in body weight ( $P \leq 0.001$ ).

891

892 **Table 2. Age and body weight of SHRs used in experiment 4**

| <b>Treatment group</b> | <b>Number of animals</b> | <b>Age at injection</b> | <b>BW at injection (g)</b> | <b>Age at physiology experiment</b> | <b>BW at physiology experiment (g)</b> |
|------------------------|--------------------------|-------------------------|----------------------------|-------------------------------------|----------------------------------------|
| Hcrt-SAP               | 6                        | 26.2 ± 0.5              | 56.1 ± 2.6                 | 38.2 ± 0.5                          | 90.4 ± 4.4                             |
| IgG-SAP                | 5                        | 27.2 ± 0.6              | 52.7 ± 3.6                 | 39.2 ± 0.6                          | 82.2 ± 5.8                             |

893 There was no statistically significant differences in body weight or age at the day of

894 injection or the day of physiological measurement between Hcrt-SAP and IgG-SAP

895 groups. Data are shown as mean ± SEM. Abbreviations: BW, body weight.

896

### Developmental changes of OX-ir neurons in the hypothalamus

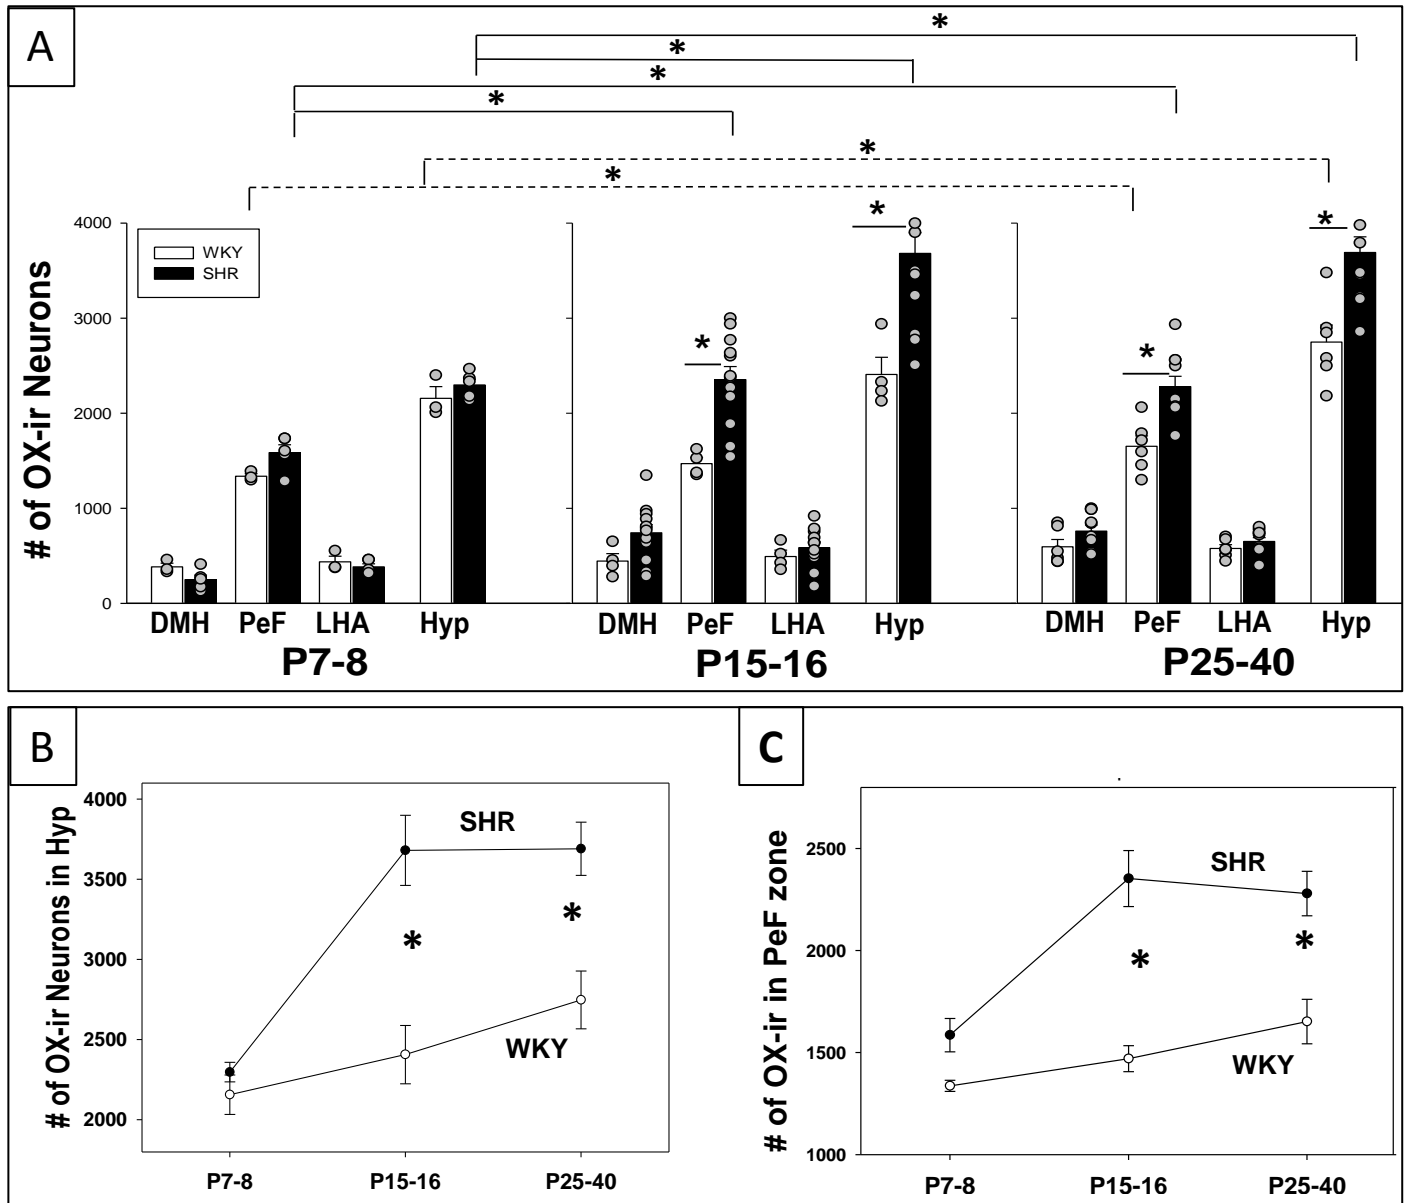

898 **Figure 1. Postnatal developmental changes of OX neurons in the hypothalamus in**  
 899 **SHRs and WKY rats.** Total number of OX neurons in the hypothalamus (Hyp) and three  
 900 hypothalamic zones (DMH, LHA, PeF) at three developmental ages, P7-8, P15-16, and  
 901 P25-40 in SHRs and WKY rats are shown in A. \*Indicates significance, Two-way  
 902 ANOVA with Holm-Sidak or Student-Newman-Keuls *post hoc* tests. B-C show the

903 comparison of OX neurons in the hypothalamus and PeF zone between SHRs and WKY  
904 rats at three developmental ages. \*Indicates significance between SHRs and WKY rats.  
905 Abbreviations: DMH, dorsomedial hypothalamus; PeF, perifornical zone; LHA, lateral  
906 hypothalamic area. Data are shown as mean  $\pm$  SEM.  
907  
908

909

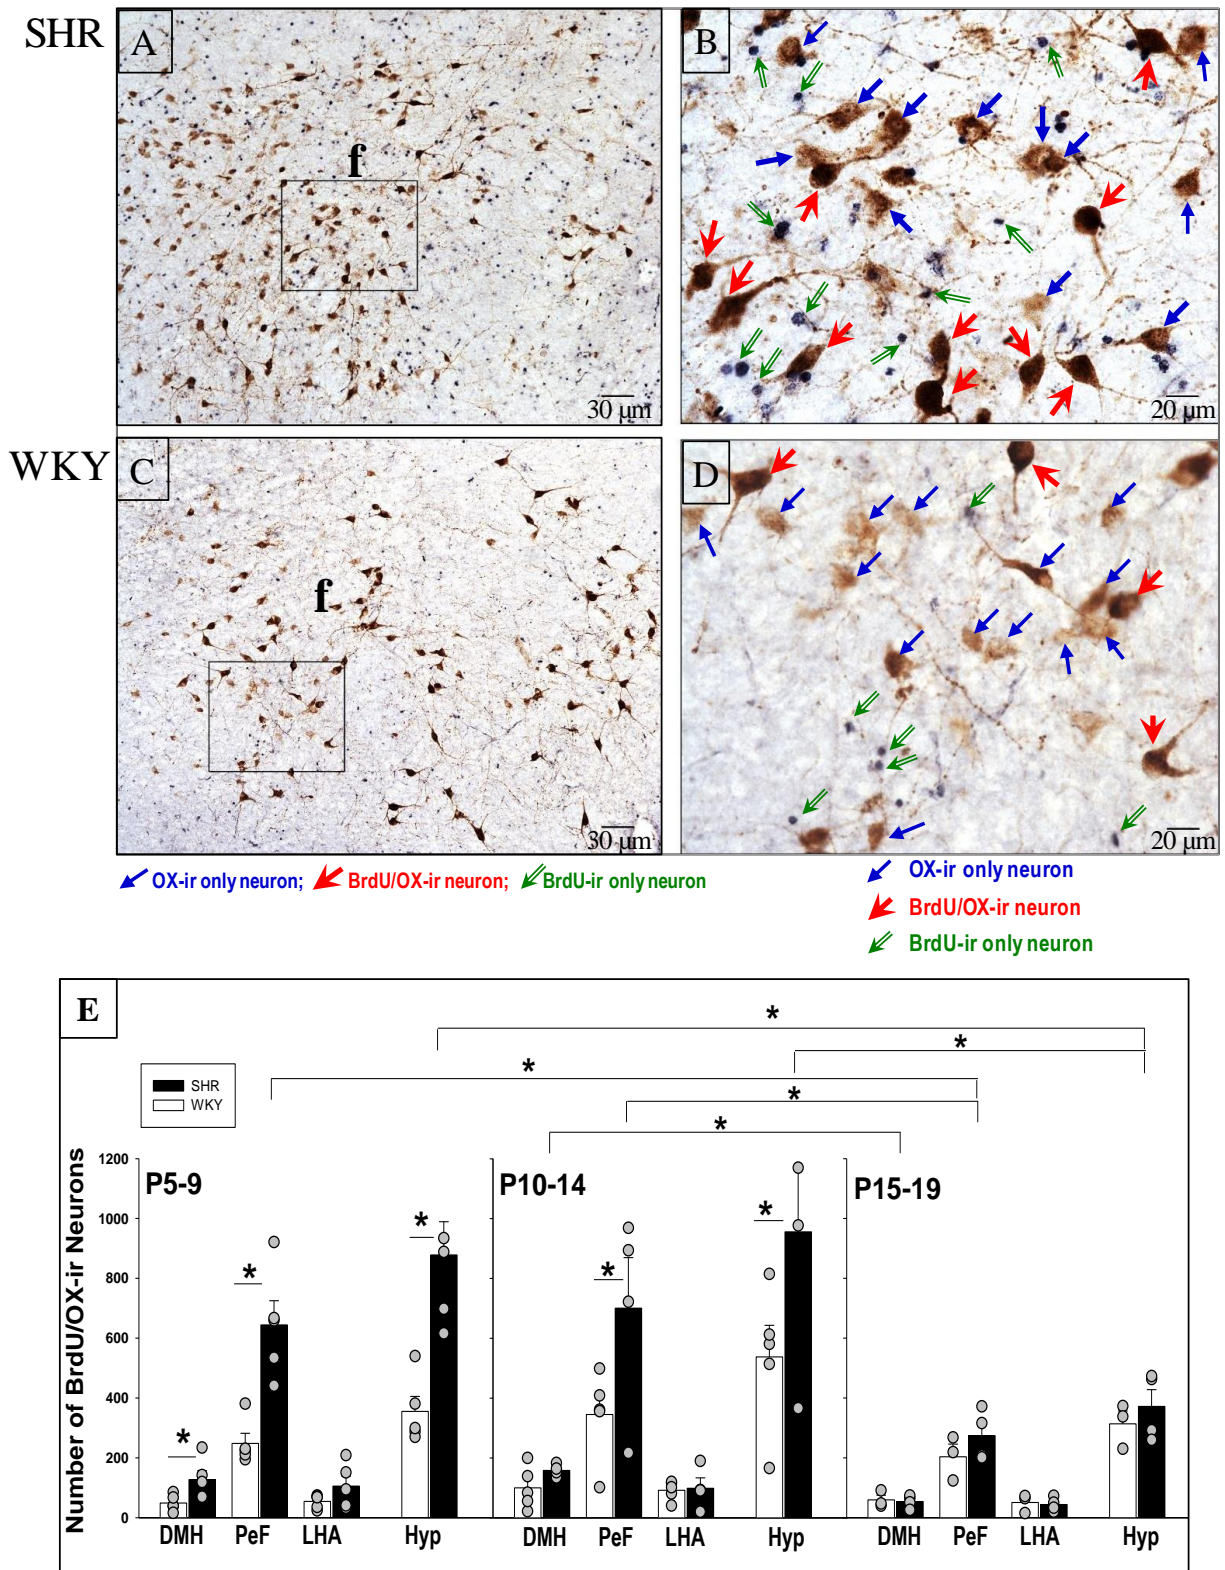

910 **Figure 2. Postnatal OX neurogenesis in SHR and WKY rats at three developmental**  
911 **periods**

912 Representative images show OX-ir and BrdU/OX-ir neurons within comparable  
913 hemispheres of the hypothalamus in SHR and WKY rats from P5-9 group (A-D), and  
914 expanded view of OX-ir neurons (blue arrows; brown neurons), BrdU/OX-ir neurons (red  
915 arrows; brown neurons with black nuclei), and BrdU-ir neurons (green arrows; black  
916 nuclei), (B, D). E shows the total number of BrdU/OX-ir neurons in the Hyp and the  
917 distribution within the three zones in SHR and WKY rats in each BrdU-injected age  
918 group. \*Values are significantly different based on Bonferroni *post hoc* test.

919 Abbreviations: DMH, dorsomedial hypothalamus; PeF, perifornical zone; LHA, lateral  
920 hypothalamic area; BrdU, bromodeoxyuridine; OX, orexin-A; ir, immunoreactive. Data are  
921 shown as mean  $\pm$  SEM.

922

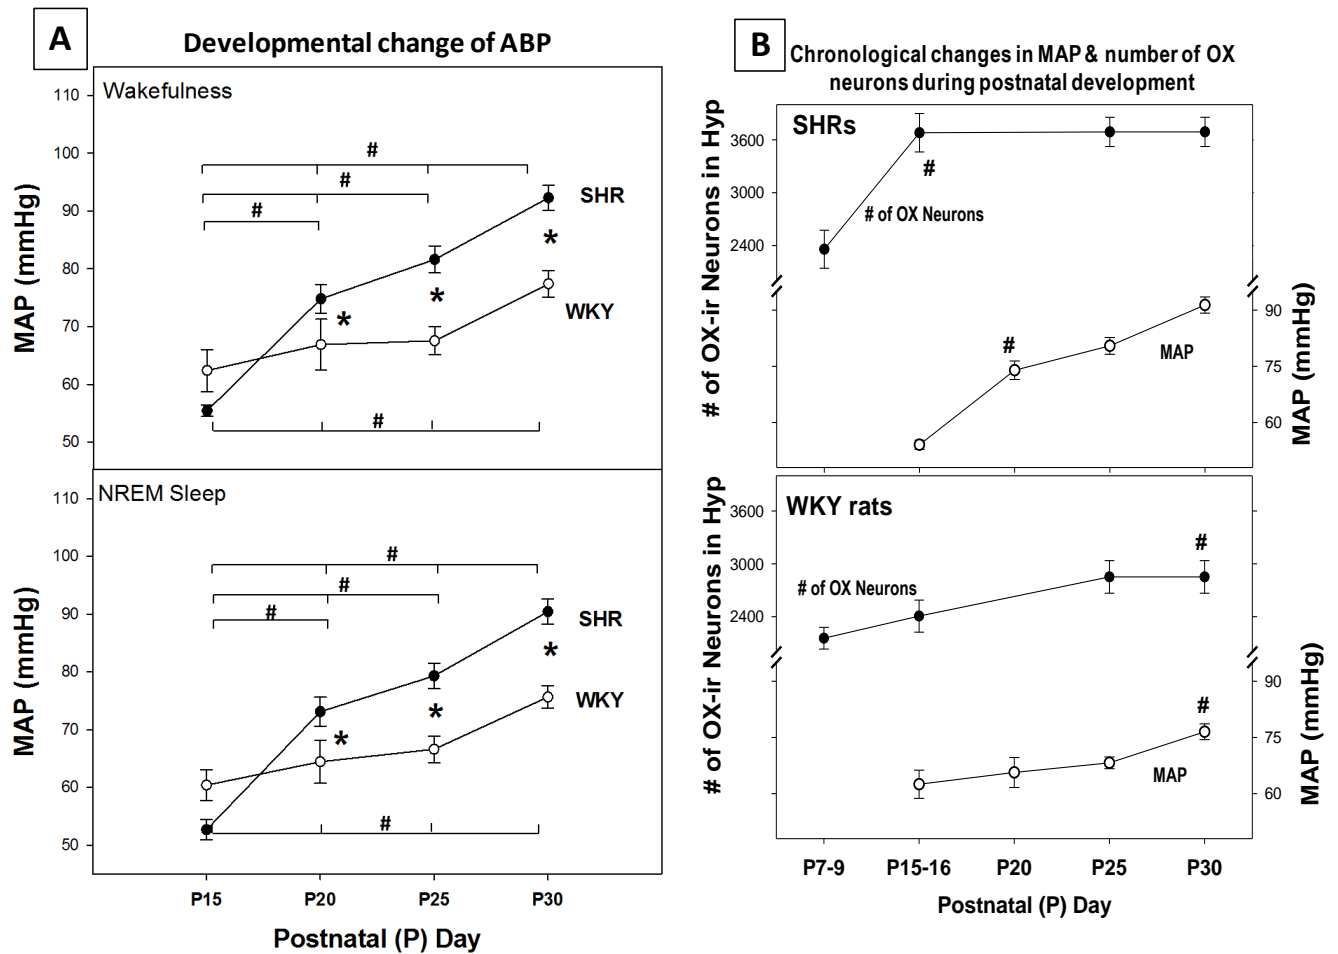

923

924 **Figure 3. Postnatal changes of mean arterial blood pressure (MAP) in SHR and**  
 925 **WKY rats.**

926 Panel A shows MAP at P15, P20, P25 and P30 in SHR and normotensive WKY rats in  
 927 wakefulness and sleep. Chronological relationship between MAP (right y-axis) and  
 928 number of OX neurons (left y-axis) in SHR and WKY rats during postnatal development is  
 929 shown in B. \* $p < 0.05$ , values are significantly different between SHR and WKY rat pups;  
 930 # $p < 0.05$ , values are significantly different with age in SHR or WKY rat. Two-way  
 931 ANOVA with Holm-Sidak *post-hoc* test. Data are shown as mean  $\pm$  SEM.

932

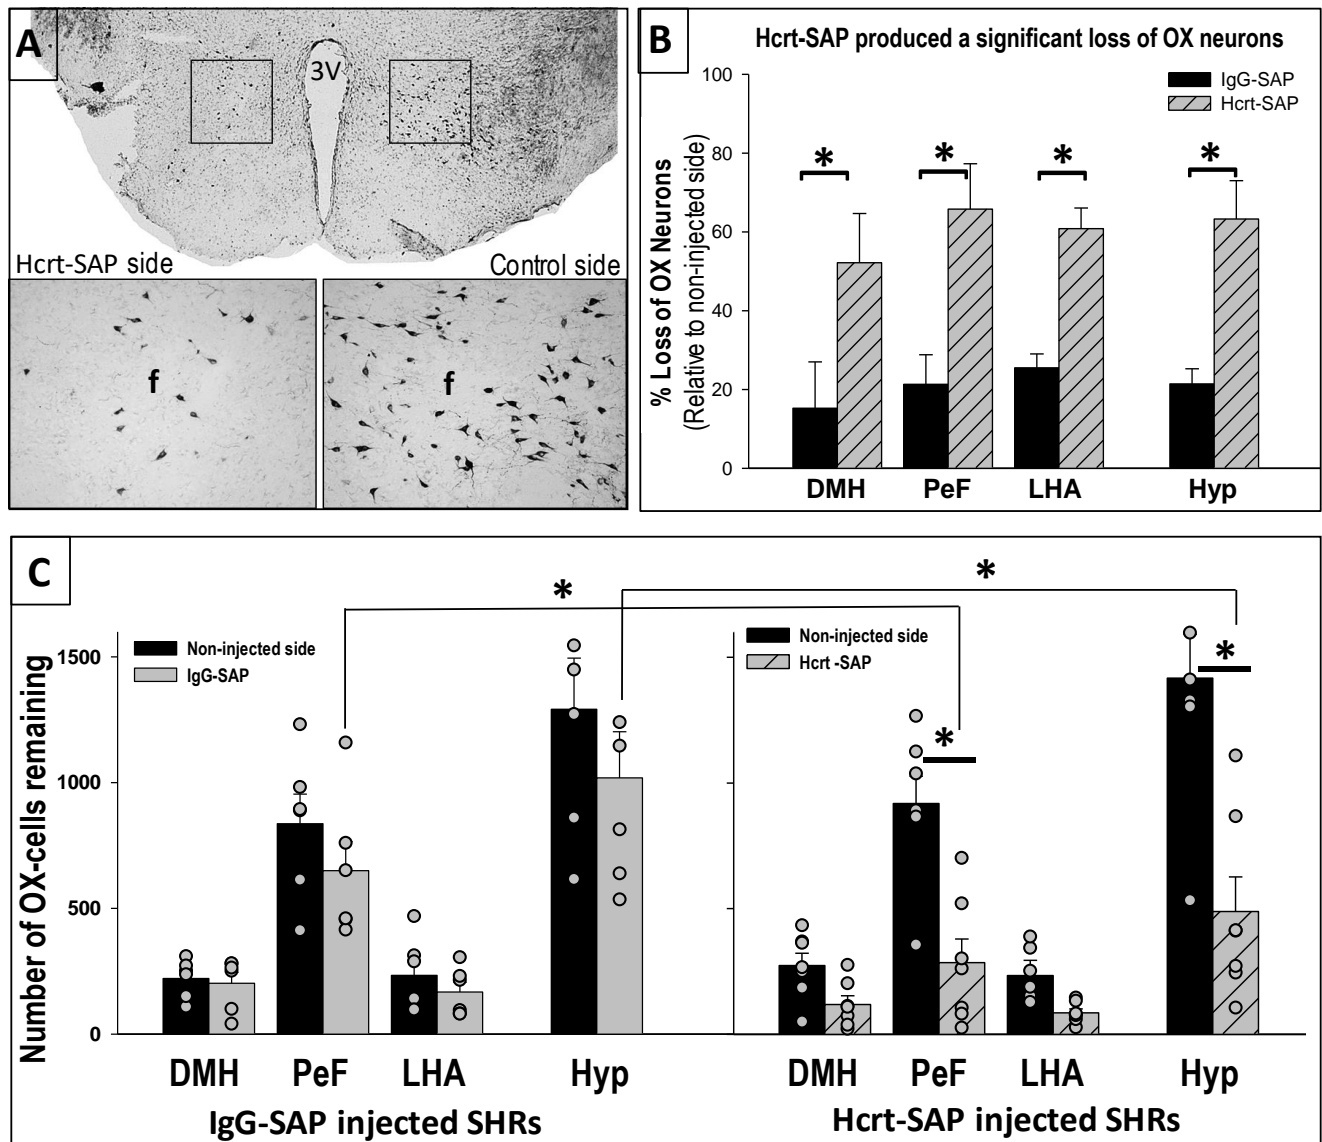

933 **Figure 4. Verification of Hcrt-SAP effect on eliminating excess OX neurons in SHR**

934 Representative images (A) top panel show a full view of the hypothalamus (10X) of Hcrt-

935 SAP injected (left) and non-injected (right) hemisphere, and lower panels show higher

936 magnification (20X) photomicrographs of the areas encompassed by the squares of top

937 panel, lesion (left) vs control (right) sides. 4B shows a comparison of percentage loss of

938 OX neurons in the injected hemisphere relative to the non-injected hemisphere between

939 Hcrt-SAP and IgG-SAP injected SHR. 4C shows comparisons of total number of OX



940 neurons between non-injected (black bar) and injected (grey bar) hemisphere in Hcrt-SAP  
941 and IgG-SAP injected SHR, and in the injected hemisphere between Hcrt-SAP (hatched  
942 bars) and IgG-SAP injected SHR. \* $p < 0.05$ , Two-way ANOVA with Holm-Sidak *post-hoc*  
943 test. Abbreviations: hcr-SAP, hypocretin-2-saporin; IgG-SAP, IgG-saporin; OX, orexin-  
944 A; f, fornix; DMH, dorsomedial hypothalamus; PeF, perifornical zone; LHA, lateral  
945 hypothalamic area; Hyp, total hypothalamus; SHR, spontaneously hypertensive rats. Data  
946 are shown as mean  $\pm$  SEM.

947

948

949

**A. The effect of eliminating excess OX-neurons on resting mean ABP**

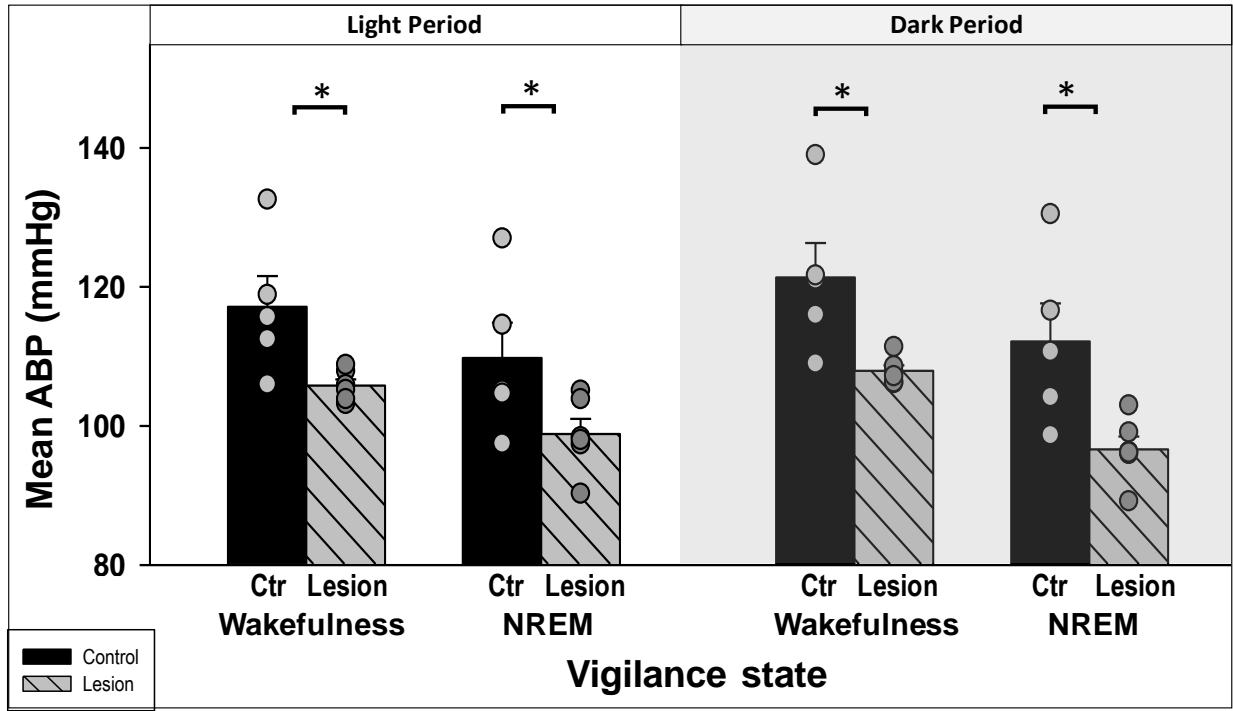

**B. Ventilatory response to hypercapnia**

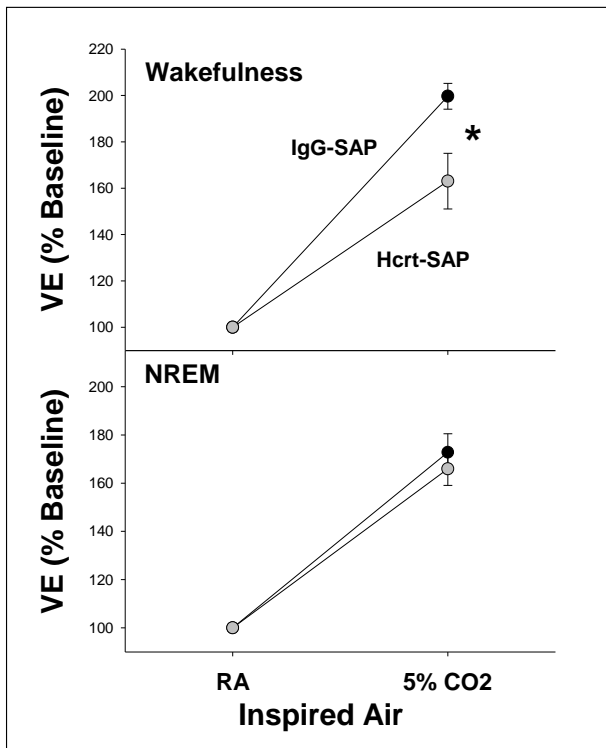

**C. MAP response to hypercapnia**

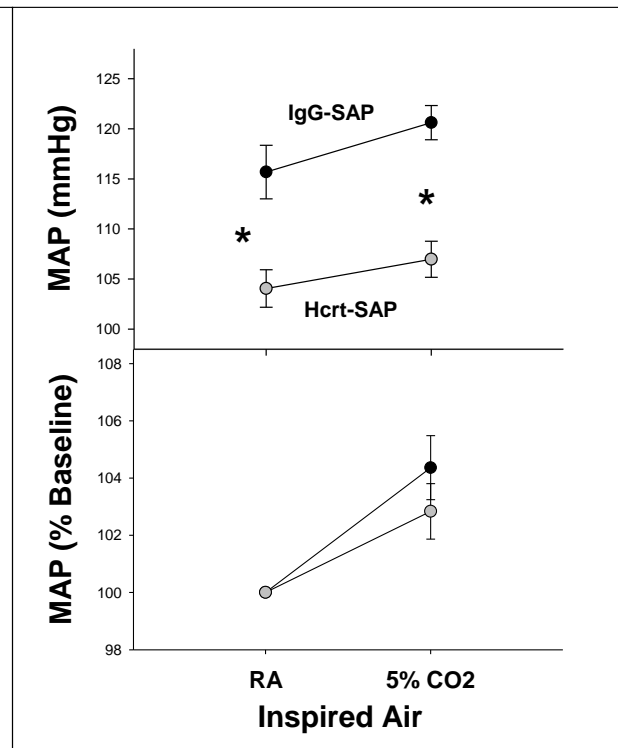

950 **Figure 5. The effects of elimination of excess OX neurons on ABP and CO<sub>2</sub>**  
951 **chemoreflex in SHRs at a developmental period.**

952 A comparison of the effects on resting mean ABP between Hcrt-SAP and IgG-SAP  
953 injected SHRs in quiet wakefulness and NREM sleep during the light and dark cycle is  
954 shown (A). Hcrt-SAP injected SHRs had a significantly lower ABP than IgG-SAP injected  
955 SHRs during the dark cycle in both NREM sleep and quiet wakefulness. Ventilatory  
956 response to hypercapnia (B) was significantly lower in Hcrt-SAP injected SHRs in  
957 wakefulness. ABP response to hypercapnia was not different between Hcrt-SAP and IgG-  
958 SAP injected SHRs despite Hcrt-SAP injected SHRs have significantly lower resting ABP  
959 (C). \* $p < 0.05$ , Two-Way ANOVA with Holm-Sidak *post-hoc* test. Data are shown as mean  
960  $\pm$  SEM. Abbreviations: NREM, non-rapid eye movement sleep; Ctr, controls; Hcrt-SAP,  
961 hypocretin-2-saporin; IgG-SAP, IgG-saporin; VE, ventilation; MAP, mean arterial blood  
962 pressure; RA, room air.
